# Supplementary material
Source: publisher figshare collection journal article supplement (https://acs.figshare.com/ndownloader/files/3938995)

# Supporting Information

## Iron-Catalyzed Radical Oxidative Coupling Reaction of Aryl Olefins with 1,3-Dithiane

Wenbin Du,<sup>†</sup> Lixia Tian,<sup>†</sup> Junshan Lai,<sup>†</sup> Xing Huo,<sup>†</sup> Xingang Xie,<sup>‡</sup> Xuegong She,<sup>‡</sup> Shouchu Tang<sup>\*†</sup>

<sup>†</sup> School of Pharmacy, Lanzhou University, Lanzhou, 730000, P. R. China

<sup>‡</sup> State Key Laboratory of Applied Organic Chemistry, Lanzhou University, Lanzhou, 730000, P. R. China

Email: tangshch@lzu.edu.cn

## Table of Contents

|                                                                                             |         |
|---------------------------------------------------------------------------------------------|---------|
| 1.General Considerations.....                                                               | S2      |
| 2.General Procedure for the Carbolithiation Reactions between 1,3-Dithiane and Alkenes..... | S2      |
| 3.General Procedure for the Cross-couplings Between 1,3-Dithiane and Alkenes.....           | S3      |
| 4.EPR Experiments.....                                                                      | S3      |
| 5.General Procedure for the Gram Scale Experiment.....                                      | S5      |
| 6.The Procedure for Radical Trapping Experiment.....                                        | S5      |
| 7. The Procedure for Radical Trapping Experiment by NaN <sub>3</sub> .....                  | S6      |
| 8. The Procedure for Radical Trapping Experiment by Methanol.....                           | S6      |
| 9. Analytical Data of Products.....                                                         | S7      |
| 10. Copies of <sup>1</sup> H and <sup>13</sup> C NMR Spectra.....                           | S12-S53 |

## 1. General Considerations

Analytical grade solvents and commercially available reagents were used as received. Substituted Styrenes were all prepared following literature procedures. Thin layer chromatography (TLC) employed glass 0.25 mm silica gel plates. Flash chromatography columns were generally performed on silica gel (200-300 mesh) in petroleum (bp. 60-90 °C) and reactions were monitored by thin layer chromatography (TLC) using silica gel GF254 plates with UV light to visualize the course of reaction.  $^1\text{H}$  and  $^{13}\text{C}$  NMR spectra were recorded in  $\text{CDCl}_3$  solution on the Bruker 300 and 400MHz instruments, and spectral data were reported in ppm relative to tetramethylsilane (TMS) as internal standard. MS were measured on a HP-5988 spectrometer by direct inlet at 70 eV. High-resolution mass spectral analysis (HRMS) data were measured on the Bruker ApexII by means of the ESI technique.

## 2. General Procedure for the Carbolithiation Reactions between 1,3-Dithiane and Alkenes

A solution of the 1,3-dithiane (1 mmol) and additives (HMPA, TMEDA or (-)-sparteine) (1.65 mmol) in anhydrous THF or  $\text{Et}_2\text{O}$  (3 mL) was cooled to  $-78\text{ }^\circ\text{C}$ .  $n\text{-BuLi}$  (2.5 M in petroleum ether, 0.9 mmol) was added dropwise via syringe, and the reaction mixture allowed to warm to  $-20\text{ }^\circ\text{C}$  while stirring for 0.5 h. The mixture was re-cooled to  $-78\text{ }^\circ\text{C}$  and a solution of the alkenes (0.50 mmol) in anhydrous THF or  $\text{Et}_2\text{O}$  (3 mL) was added dropwise via syringe. After the reaction was stirring for 1 h, The mixture was warmed to  $-20\text{ }^\circ\text{C}$  over 1 h. After stirring an additional 4 h the reaction was quenched with saturated aqueous  $\text{NH}_4\text{Cl}$  (6 mL) and then diluted with  $\text{Et}_2\text{O}$  (20 mL). The organic layers were separated, the aqueous phase extracted with  $\text{Et}_2\text{O}$  ( $3\times 5\text{ mL}$ ), and the combined organic layers dried over anhydrous  $\text{Na}_2\text{SO}_4$ , filtered and concentrated.

**Table 1. Carbolithiation Reaction between 1,3-Dithiane and Alkenes under Varied Conditions.**

| 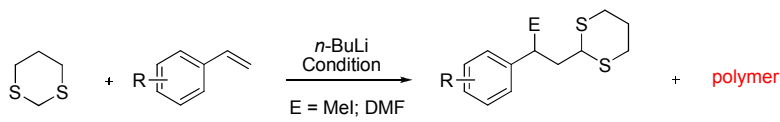 |                                                                                          |                       |               |  |
|--------------------------------------------------------------------------------------|------------------------------------------------------------------------------------------|-----------------------|---------------|--|
| R                                                                                    | Condition                                                                                | Solvent               | Result        |  |
| R = Me                                                                               | HMPA<br>$-78\text{ }^\circ\text{C}$ , 1 h;<br>up to $-20\text{ }^\circ\text{C}$          | $\text{Et}_2\text{O}$ | NR<br>polymer |  |
| R = Me                                                                               | HMPA<br>$-78\text{ }^\circ\text{C}$ , 1 h;<br>up to $-20\text{ }^\circ\text{C}$          | THF                   | NR<br>polymer |  |
| R = Me                                                                               | TMEDA<br>$-78\text{ }^\circ\text{C}$ , 1 h;<br>up to $-20\text{ }^\circ\text{C}$         | $\text{Et}_2\text{O}$ | NR<br>polymer |  |
| R = Me                                                                               | TMEDA<br>$-78\text{ }^\circ\text{C}$ , 1 h;<br>up to $-20\text{ }^\circ\text{C}$         | THF                   | NR<br>polymer |  |
| R = Me                                                                               | (-)-sparteine<br>$-78\text{ }^\circ\text{C}$ , 1 h;<br>up to $-20\text{ }^\circ\text{C}$ | $\text{Et}_2\text{O}$ | NR<br>polymer |  |
| R = Me                                                                               | (-)-sparteine<br>$-78\text{ }^\circ\text{C}$ , 1 h;<br>up to $-20\text{ }^\circ\text{C}$ | THF                   | NR<br>polymer |  |
| R = H                                                                                | (-)-sparteine<br>$-78\text{ }^\circ\text{C}$ , 1 h;<br>up to $-20\text{ }^\circ\text{C}$ | $\text{Et}_2\text{O}$ | NR<br>polymer |  |
| R = OMe                                                                              | (-)-sparteine<br>$-78\text{ }^\circ\text{C}$ , 1 h;<br>up to $-20\text{ }^\circ\text{C}$ | $\text{Et}_2\text{O}$ | NR<br>polymer |  |

## 3. General Procedure for the Cross-coupling between 1,3-Dithiane and Alkenes

To a flame-dried 10 mL flask were sequentially added 1,3-dithiane (0.25 mmol) and NCS (0.3 mmol), DCE (2 mL), after dissolved the mixture was stirred at 0 °C for 40 mins. Then alkenes (0.225 mmol) and FeCl<sub>3</sub> (0.025 mmol) were added at reaction temperature. Reaction mixture was stirred at -30 °C ~ room temperature for 8-24h until TLC analysis showed the reaction was completed. Reaction mixture was diluted with ethyl acetate (10 mL) and H<sub>2</sub>O (1 mL). The organic layer was separated, and the aqueous phase was re-extracted with ethyl acetate (3×3 mL). The combined organic extracts were washed with brine (10 mL), and dried over anhydrous Na<sub>2</sub>SO<sub>4</sub>, and purified by the flash chromatography to afford the desired product.

**Table 2. Cross-coupling between 1,3-Dithiane and Styrene under Varied Conditions.<sup>a</sup>**

| entry | catalyst                      | activating agent | solvent                         | yield(%) <sup>b</sup> |
|-------|-------------------------------|------------------|---------------------------------|-----------------------|
| 1     | FeCl <sub>3</sub> (10 %)      | DDQ              | CH <sub>2</sub> Cl <sub>2</sub> | trace                 |
| 2     | CuI(15 %)                     | DDQ              | CH <sub>2</sub> Cl <sub>2</sub> | 0                     |
| 3     | PdCl <sub>2</sub> (5 %)       | DDQ              | CH <sub>2</sub> Cl <sub>2</sub> | trace                 |
| 4     | FeCl <sub>3</sub> (10 %)      | None             | CH <sub>2</sub> Cl <sub>2</sub> | 0                     |
| 5     | FeCl <sub>3</sub> (10 %)      | NCS              | CH <sub>2</sub> Cl <sub>2</sub> | 75                    |
| 6     | <b>FeCl<sub>3</sub>(10 %)</b> | <b>NCS</b>       | <b>DCE</b>                      | <b>86</b>             |
| 7     | None                          | NCS              | DCE                             | 0                     |
| 8     | FeCl <sub>3</sub> (10 %)      | NBS              | DCE                             | trace                 |
| 9     | FeCl <sub>3</sub> (5 %)       | NCS              | DCE                             | 83                    |
| 10    | FeCl <sub>3</sub> (15 %)      | NCS              | DCE                             | 84                    |
| 11    | FeCl <sub>3</sub> (10 %)      | NCS              | toluene                         | 0                     |
| 12    | FeCl <sub>3</sub> (10 %)      | NCS              | DMF                             | 0                     |
| 13    | FeCl <sub>3</sub> (10 %)      | NCS              | THF                             | trace                 |

<sup>a</sup> Reaction conditions: all of the reactions were performed with **1** (30 mg, 0.25 mmol), **2a** (23.4 mg, 0.225 mmol), catalyst (5~15 %) and activating agent (0.3 mmol) in 2 mL of solvent at 0 °C for 12 h.

<sup>b</sup>Yield of isolated product.

#### 4. EPR Experiments.

##### a) Procedure for EPR Investigation of NCS, FeCl<sub>3</sub>, and 1,3-Dithiane.

NCS (13.3 mg, 0.1 mmol), FeCl<sub>3</sub> (16.3 mg, 0.1 mmol), and 1,3-dithiane (12 mg, 0.1 mmol) was dissolved in 1 mL DCE, the mixture was stirred at room temperature for few minutes, and then few of this solution was taken out by a capillary tube and sealed up, then analyzed by EPR at room temperature (Figure S1).

##### b) Procedure for EPR Investigation of the Reaction between NCS and FeCl<sub>3</sub> or 1,3-Dithiane.

To a flame-dried 10 mL flask were sequentially added NCS (13.3 mg, 0.1 mmol) and 1 mL DCE

were combined. Then 1,3-dithiane (12 mg, 0.1 mmol) or  $\text{FeCl}_3$  (16.3 mg, 0.1 mmol) was added. After the mixture was stirred for few minutes, few of this solution was taken out by a capillary tube and sealed up, then analyzed by EPR at room temperature.

**c) Procedure for EPR Investigation of the Reaction between 1,3-Dithiane, NCS and  $\text{FeCl}_3$ .**

To a flame-dried 10 mL flask were sequentially added 1,3-dithiane (12 mg, 0.1 mmol), NCS (13.3 mg, 0.1 mmol),  $\text{FeCl}_3$  (16.3 mg, 0.1 mmol) and 1 mL DCE were combined. After the mixture was stirred for few minutes, few of this solution was taken out by a capillary tube and sealed up, then analyzed by EPR at room temperature.

**d) Procedure for EPR Investigation of the Radical Cross-Coupling between 1,3-Dithiane and Styrene.**

To a flame-dried 10 mL flask were sequentially added 1,3-dithiane (30 mg, 0.25 mmol), NCS (40 mg, 0.3 mmol), and styrene **2a** (23.4 mg, 0.225 mmol), DCE (2 mL), at room temperature. After the mixture was stirred for few minutes, few of this solution was taken out by a capillary tube and sealed up, then analyzed by EPR at room temperature. (Figure S2, 0 min). Then  $\text{FeCl}_3$  (0.025 mmol) was added in the mixture, and after 25 mins and 50 mins, few of this solution was taken out by a capillary tube and sealed up, then analyzed by EPR at room temperature. (Figure S2, 25 min and 50 min).

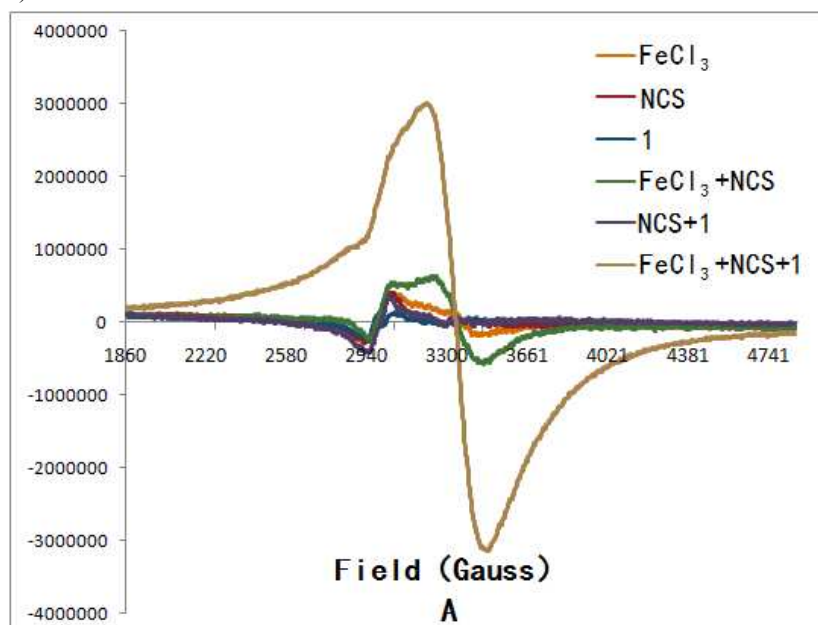

**Figure S1.** EPR spectra from the reaction between 1)  $\text{FeCl}_3$ , **1**, NCS; 2) NCS and **1** or  $\text{FeCl}_3$ ; 3) the mixture of  $\text{FeCl}_3$ , **1** and NCS in DCE at room temperature.

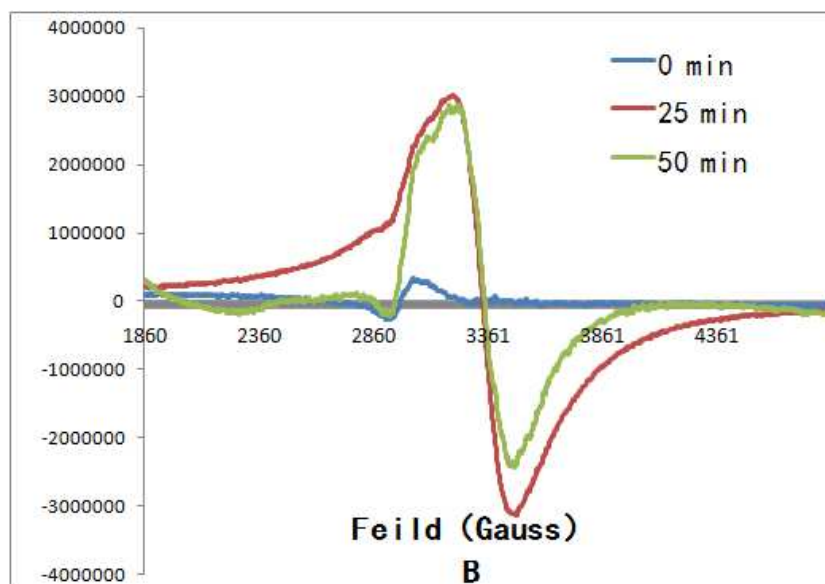

Figure S2. EPR spectra acquired during the cross-coupling reaction time course between 1 and 2a.

## 5. General Procedure for the Gram Scale Experiment

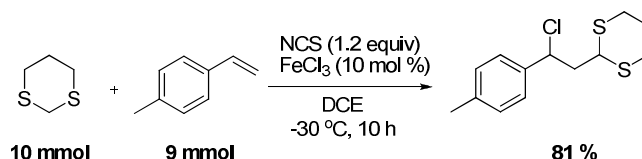

To a flame-dried 100 mL flask were sequentially added 1,3-dithiane (1.2 g, 10 mmol) and NCS (1.6 g, 12 mmol), DCE (60 mL), after dissolved the mixture was stirred at 0 °C for 40 mins. Then 4-methylphenylene (1.06 g, 9 mmol) and  $\text{FeCl}_3$  (162.5 mg, 1 mmol) were added. Reaction mixture was stirred at -30 °C for 10 h until TLC analysis showed the reaction was completed. Reaction mixture was diluted with ethyl acetate (120 mL) and  $\text{H}_2\text{O}$  (40 mL). The organic layer was separated, and the aqueous phase was re-extracted with ethyl acetate (3×50 mL). The combined organic extracts were washed with  $\text{H}_2\text{O}$  (30 mL), and dried over anhydrous  $\text{Na}_2\text{SO}_4$ , and purified by the flash chromatography to afford the desired product.

## 6. The Procedure for Radical Trapping Experiment.

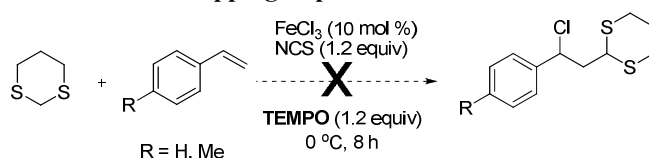

To a flame-dried 10 mL flask were sequentially added 1,3-dithiane (30 mg, 0.25 mmol) and NCS (40 mg, 0.3 mmol), DCE (2 mL), after dissolved the mixture was stirred at 0 °C for 40 min. Then TEMPO (46.9 mg, 0.3 mmol), styrene (23.4 mg, 0.225 mmol) or 4-methylphenylene (26.5 mg, 0.225 mmol) and  $\text{FeCl}_3$  (4.1 mg, 0.025 mmol) were added. Reaction mixture was stirred at 0 °C for 8 h. Then reaction mixture was diluted with ethyl acetate (3 mL) and  $\text{H}_2\text{O}$  (1 mL). The organic layer

was separated, and the aqueous phase was re-extracted with ethyl acetate (3×3 mL). The combined organic extracts were washed with H<sub>2</sub>O (10 mL), and dried over anhydrous Na<sub>2</sub>SO<sub>4</sub>.

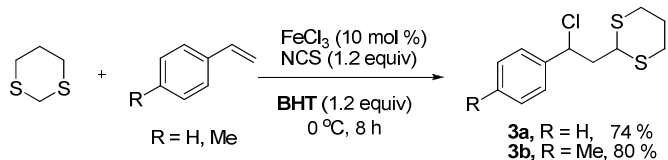

To a flame-dried 10 mL flask were sequentially added 1,3-dithiane (30 mg, 0.25 mmol) and NCS (40 mg, 0.3 mmol), DCE (2 mL), after dissolved the mixture was stirred at 0 °C for 40 min. Then BHT (66.1 mg, 0.3 mmol), styrene (23.4 mg, 0.225 mmol) or 4-methylphenylene (26.5 mg, 0.225 mmol) and FeCl<sub>3</sub> (4.1 mg, 0.025 mmol) were added. Reaction mixture was stirred at 0 °C for 8 h. Then reaction mixture was diluted with ethyl acetate (3 mL) and H<sub>2</sub>O (1 mL). The organic layer was separated, and the aqueous phase was re-extracted with ethyl acetate (3×3 mL). The combined organic extracts were washed with H<sub>2</sub>O (10 mL), and dried over anhydrous Na<sub>2</sub>SO<sub>4</sub>, and purified by the flash chromatography to afford the desired product.

#### 7. The Procedure for Radical Trapping Experiment by NaN<sub>3</sub>.

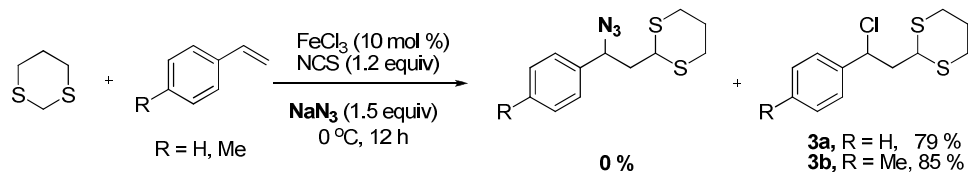

To a flame-dried 10 mL flask were sequentially added 1,3-dithiane (30 mg, 0.25 mmol) and NCS (40 mg, 0.3 mmol), DCE (2 mL), after dissolved the mixture was stirred at 0 °C for 40 min. Then NaN<sub>3</sub> (24.4 mg, 0.375 mmol) was added. After 1h styrene (23.4 mg, 0.225 mmol) or 4-methylphenylene (26.5 mg, 0.225 mmol) and FeCl<sub>3</sub> (4.1 mg, 0.025 mmol) were added. Reaction mixture was stirred at 0 °C for 12 h. Then reaction mixture was diluted with ethyl acetate (3 mL) and H<sub>2</sub>O (1 mL). The organic layer was separated, and the aqueous phase was re-extracted with ethyl acetate (3×3 mL). The combined organic extracts were washed with H<sub>2</sub>O (10 mL), and dried over anhydrous Na<sub>2</sub>SO<sub>4</sub>, and purified by the flash chromatography to afford the desired product.

#### 8. The Procedure for Radical Trapping Experiment by methanol.

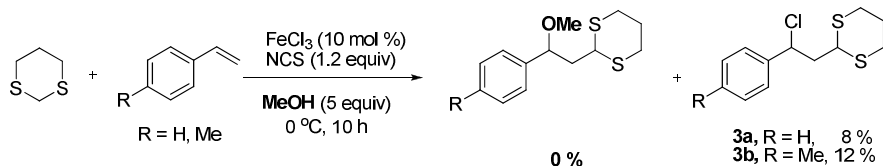

To a flame-dried 10 mL flask were sequentially added 1,3-dithiane (30 mg, 0.25 mmol) and NCS (40 mg, 0.3 mmol), DCE (2 mL), after dissolved the mixture was stirred at 0 °C for 40 min. Then methanol (40 mg, 1.25 mmol) was added. After 1h styrene (23.4 mg, 0.225 mmol) or 4-methylphenylene (26.5 mg, 0.225 mmol) and FeCl<sub>3</sub> (4.1 mg, 0.025 mmol) were added. Reaction

mixture was stirred at 0 °C for 10 h. Then reaction mixture was diluted with ethyl acetate (3 mL) and H<sub>2</sub>O (1 mL). The organic layer was separated, and the aqueous phase was re-extracted with ethyl acetate (3×3 mL). The combined organic extracts were washed with H<sub>2</sub>O (10 mL), and dried over anhydrous Na<sub>2</sub>SO<sub>4</sub>, and purified by the flash chromatography to afford the desired product.

### 9. Analytical Data of Products

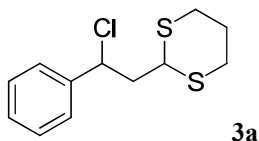

**<sup>1</sup>H NMR (400 MHz, CDCl<sub>3</sub>):**  $\delta$  = 7.33-7.22 (m, 5H), 5.12 (dd,  $J$  = 4.0, 8.0 Hz, 1H), 3.95 (dd,  $J$  = 8.0, 16.0 Hz, 1H), 2.76-2.70 (m, 4H), 2.51-2.33 (m, 2H), 2.00-1.76 (m, 2H). **<sup>13</sup>C NMR (100 MHz, CDCl<sub>3</sub>):**  $\delta$  = 140.3, 128.6, 128.4, 126.8, 59.7, 44.8, 43.6, 29.2, 29.1, 25.6. **IR (KBr) cm<sup>-1</sup>:** 3043.2, 2905.7, 1602.3, 1266.5, 737.3. **HRMS (ESI):** calculated for C<sub>12</sub>H<sub>15</sub>ClNaS<sub>2</sub> [M+Na]<sup>+</sup>: 281.0201; **found:** 281.0202.

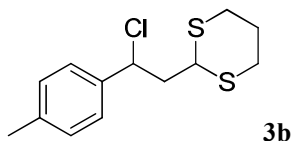

**<sup>1</sup>H NMR (400 MHz, CDCl<sub>3</sub>):**  $\delta$  = 7.29 (d,  $J$  = 8 Hz, 2H), 7.16 (d,  $J$  = 8.0 Hz, 2H), 5.17 (dd,  $J$  = 6.0, 8.8 Hz, 1H), 4.02 (dd,  $J$  = 6.4, 8.4 Hz, 1H), 2.83-2.79 (m, 4H), 2.60-2.38 (m, 2H), 2.35 (d,  $J$  = 9.2, 3H), 2.12-1.85 (m, 2H). **<sup>13</sup>C NMR (100 MHz, CDCl<sub>3</sub>):**  $\delta$  = 138.4, 137.5, 129.3, 126.8, 59.7, 44.8, 43.7, 29.3, 29.2, 25.7, 21.1. **IR (KBr) cm<sup>-1</sup>:** 3057.5, 2911.2, 1601.7, 1477.3, 142.6, 1281.4, 908.8, 790.2, 736.4. **HRMS (ESI):** calculated for C<sub>13</sub>H<sub>17</sub>ClNaS<sub>2</sub> [M+Na]<sup>+</sup>: 295.0358; **found:** 295.0356.

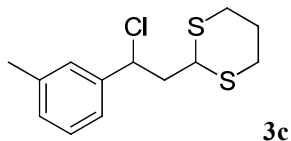

**<sup>1</sup>H NMR (400 MHz, CDCl<sub>3</sub>):**  $\delta$  = 7.25-7.10 (m, 4H), 5.16 (dd,  $J$  = 8.0, 16.0 Hz, 1H), 4.04 (dd,  $J$  = 8.0, 16.0 Hz, 1H), 2.82-2.78 (m, 4H), 2.55 (t,  $J$  = 4 Hz, 2H), 2.43-2.34 (m, 3H), 2.09-1.84 (m, 2H). **<sup>13</sup>C NMR (100 MHz, CDCl<sub>3</sub>):**  $\delta$  = 140.3, 138.2, 129.2, 128.4, 127.5, 123.9, 59.8, 44.7, 43.5, 29.2, 29.0, 25.6, 21.2. **IR (KBr) cm<sup>-1</sup>:** 3053.6, 2902.4, 1606.8, 1489.1, 1423.0, 1265.1, 906.4, 784.4, 737.9. **HRMS (ESI):** calculated for C<sub>13</sub>H<sub>17</sub>ClNaS<sub>2</sub> [M+Na]<sup>+</sup>: 295.0358; **found:** 295.0362.

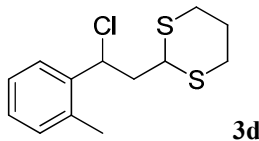

**<sup>1</sup>H NMR (400 MHz, CDCl<sub>3</sub>):**  $\delta$  = 7.49-7.14 (m, 4H), 5.49 (dd,  $J$  = 8.0, 12.0 Hz, 1H), 4.16 (dd,  $J$  = 4.0, 8.0 Hz, 1H), 2.85-2.80 (m, 4H), 2.56 (dd,  $J$  = 4.0, 8.0 Hz, 2H), 2.46-2.40 (m, 3H), 2.12-1.85 (m, 2H). **<sup>13</sup>C NMR (100 MHz, CDCl<sub>3</sub>):**  $\delta$  = 138.4, 135.3, 130.5, 128.2, 126.5, 126.2, 55.9, 43.8, 43.7, 29.4, 29.2, 25.7, 19.0. **IR (KBr) cm<sup>-1</sup>:** 3044.6, 2899.1, 1611.4, 1490.3, 1422.8, 1259.8, 901.2, 792.4, 739.2. **HRMS (ESI):** calculated for C<sub>13</sub>H<sub>17</sub>ClNaS<sub>2</sub> [M+Na]<sup>+</sup>: 295.0358; **found:** 295.0360.

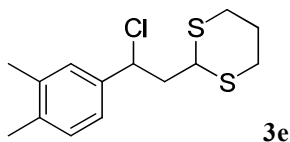

**<sup>1</sup>H NMR (300 MHz, CDCl<sub>3</sub>):**  $\delta$  = 7.10-7.05 (m, 3H), 5.08 (dd,  $J$  = 6.0, 9.0 Hz, 1H), 3.98 (dd,  $J$  = 6.0, 9.0 Hz, 1H), 2.79-2.74 (m, 4H), 2.55-2.28 (m, 2H), 2.19 (d,  $J$  = 6 Hz, 6H), 2.07-1.79 (m, 2H). **<sup>13</sup>C NMR (75 MHz, CDCl<sub>3</sub>):**  $\delta$  = 137.9, 137.2, 137.0, 129.9, 128.2, 124.3, 59.9, 44.7, 43.8, 29.4, 29.2, 25.8, 19.8, 19.5. **IR (KBr) cm<sup>-1</sup>:** 3036.9, 2910.2, 1609.4, 1474.3, 1417.6, 1260.9, 906.4, 789.4, 733.1. **HRMS (ESI):** calculated for C<sub>14</sub>H<sub>19</sub>ClNaS<sub>2</sub> [M+Na]<sup>+</sup>: 309.0514; **found:** 309.0517.

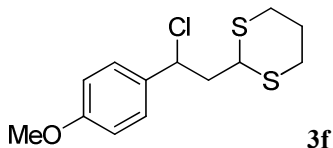

**<sup>1</sup>H NMR (400 MHz, CDCl<sub>3</sub>):**  $\delta$  = 7.30-6.85 (m, 4H), 5.16 (dd,  $J$  = 6.0, 9.2 Hz, 1H), 4.04 (dd,  $J$  = 6.0, 8.4 Hz, 1H), 3.82 (s, 3H), 2.86-2.82 (m, 4H), 2.59-2.37 (m, 2H), 2.14-1.86 (m, 2H). **<sup>13</sup>C NMR (100 MHz, CDCl<sub>3</sub>):**  $\delta$  = 159.8, 142.0, 129.8, 119.2, 114.1, 112.6, 59.7, 55.3, 44.9, 43.7, 29.4, 29.2, 25.8. **IR (KBr) cm<sup>-1</sup>:** 3327.9, 2915.2, 2898.4, 1597.4, 1493.7, 1452.0, 1258.9, 1042.0, 741.5, 698.2. **HRMS (ESI):** calculated for C<sub>13</sub>H<sub>17</sub>ClNaOS<sub>2</sub> [M+Na]<sup>+</sup>: 311.0307; **found:** 311.0304.

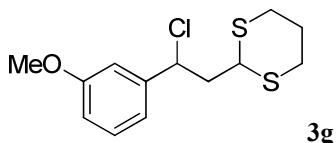

**<sup>1</sup>H NMR (400 MHz, CDCl<sub>3</sub>):**  $\delta$  = 7.29-6.84 (m, 4H), 5.16 (dd,  $J$  = 6.0, 8.4 Hz, 1H), 4.03 (dd,  $J$  = 6.4, 8.4 Hz, 1H), 3.81 (s, 3H), 2.87-2.77 (m, 4H), 2.60-2.37 (m, 2H), 2.13-1.86 (m, 2H). **<sup>13</sup>C NMR (100 MHz, CDCl<sub>3</sub>):**  $\delta$  = 159.7, 142.0, 129.7, 119.2, 114.0, 112.6, 59.6, 55.2, 44.8, 43.6, 29.3, 29.2, 25.7. **IR (KBr) cm<sup>-1</sup>:** 3336.8, 2935.5, 2907.5, 1600.5, 1491.3, 1434.5, 1266.7, 1047.8, 737.3, 700.5. **HRMS (ESI):** calculated for C<sub>13</sub>H<sub>17</sub>ClNaOS<sub>2</sub> [M+Na]<sup>+</sup>: 311.0307; **found:** 311.0302.

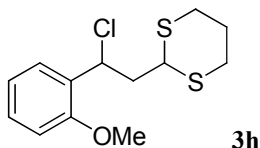

**<sup>1</sup>H NMR (300 MHz, CDCl<sub>3</sub>):**  $\delta$  = 7.43-6.85 (m, 4H), 5.71 (dd,  $J$  = 3.0, 9.0 Hz, 1H), 4.21 (dd,  $J$  = 6.0, 9.0 Hz, 1H), 3.82 (d,  $J$  = 3.0 Hz, 3H), 2.86-2.81 (m, 4H), 2.50-2.42 (m, 2H), 2.12-1.85 (m, 2H). **<sup>13</sup>C NMR (75 MHz, CDCl<sub>3</sub>):**  $\delta$  = 154.8, 128.3, 127.5, 126.4, 119.6, 109.6, 54.4, 53.2, 42.8, 42.5, 28.4, 27.9, 25.7, 24.7. **IR (KBr) cm<sup>-1</sup>:** 3339.1, 2946.8, 2909.1, 1605.8, 1499.4, 1447.0, 1256.3, 1050.7, 736.3, 706.4. **HRMS (ESI):** calculated for C<sub>13</sub>H<sub>17</sub>ClNaOS<sub>2</sub> [M+Na]<sup>+</sup>: 311.0307; **found:** 311.0310.

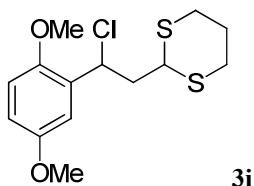

**<sup>1</sup>H NMR (300 MHz, CDCl<sub>3</sub>):**  $\delta$  = 7.05-6.80 (m, 3H), 5.78 (dd,  $J$  = 6.0, 9.0 Hz, 1H), 4.21 (dd,  $J$  = 6.0, 9.0 Hz, 1H), 3.78 (d,  $J$  = 9.0 Hz, 6H), 2.90-2.78 (m, 4H), 2.44 (t,  $J$  = 6 Hz, 2H), 2.13-1.85 (m,



2H). **<sup>13</sup>C NMR (75 MHz, CDCl<sub>3</sub>)**: δ = 153.4, 150.0, 129.5, 113.8, 113.4, 111.7, 56.0, 55.5, 54.1, 43.6, 43.5, 29.3, 28.7, 25.6. **IR (KBr) cm<sup>-1</sup>**: 3341.7, 2951.8, 2915.3, 1611.2, 1503.0, 1428.6, 1273.8, 1050.2, 744.3, 703.1. **HRMS (ESI)**: calculated for C<sub>14</sub>H<sub>19</sub>ClNaO<sub>2</sub>S<sub>2</sub> [M+Na]<sup>+</sup>: 341.0413; **found**: 341.0416.

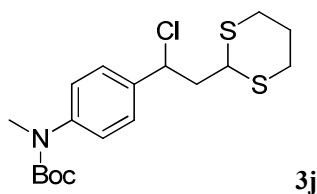

**<sup>1</sup>H NMR (300 MHz, CDCl<sub>3</sub>)**: δ = 7.38-7.24 (m, 4H), 5.19 (t, *J* = 6.0 Hz, 1H), 4.15-4.00 (m, 1H), 3.27 (s, 3H), 2.84 (t, *J* = 6.0 Hz, 4H), 2.56-2.40 (m, 2H), 2.10-1.88 (m, 2H), 1.47 (s, 9H). **<sup>13</sup>C NMR (75 MHz, CDCl<sub>3</sub>)**: δ = 154.4, 143.8, 137.0, 127.2, 125.3, 80.5, 59.2, 44.7, 43.6, 37.0, 29.6, 29.3, 29.2, 28.2, 25.7. **IR (KBr) cm<sup>-1</sup>**: 3355.2, 2915.2, 1597.4, 1493.7, 1421.7, 1258.9, 1042.0, 741.5. **HRMS (ESI)**: calculated for C<sub>18</sub>H<sub>26</sub>ClNNaO<sub>2</sub>S<sub>2</sub> [M+Na]<sup>+</sup>: 410.0991; **found**: 410.0995.

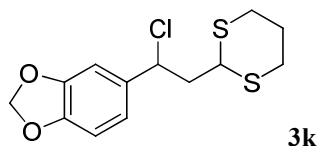

**<sup>1</sup>H NMR (300 MHz, CDCl<sub>3</sub>)**: δ = 6.91-6.75 (m, 3H), 5.98 (s, 2H), 5.13 (t, *J* = 9.0 Hz, 1H), 3.99 (t, *J* = 6.0 Hz, 1H), 2.88-2.77 (m, 4H), 2.59-2.33 (m, 2H), 2.12-1.84 (m, 2H). **<sup>13</sup>C NMR (75 MHz, CDCl<sub>3</sub>)**: δ = 147.9, 147.7, 134.1, 120.7, 107.9, 107.2, 101.2, 59.8, 44.8, 43.6, 29.3, 29.2, 25.7. **IR (KBr) cm<sup>-1</sup>**: 3348.0, 2953.2, 2915.0, 1608.2, 1487.3, 1431.8, 1394.3, 1364.3, 1261.0, 1052.6, 744.1, 694.8. **HRMS (ESI)**: calculated for C<sub>13</sub>H<sub>15</sub>ClNaO<sub>2</sub>S<sub>2</sub> [M+Na]<sup>+</sup>: 325.0100; **found**: 325.0099.

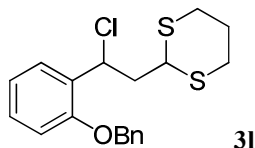

**<sup>1</sup>H NMR (300 MHz, CDCl<sub>3</sub>)**: δ = 7.52-6.91 (m, 9H), 5.81 (t, *J* = 6 Hz, 1H), 5.12 (s, 2H), 4.17 (t, *J* = 6 Hz, 1H), 2.81-2.78 (m, 4H), 2.76-2.49 (m, 2H), 2.07-1.83 (m, 2H). **<sup>13</sup>C NMR (75 MHz, CDCl<sub>3</sub>)**: δ = 154.9, 136.6, 129.4, 129.1, 128.4, 127.9, 127.8, 127.2, 121.1, 112.1, 70.1, 54.5, 43.7, 43.5, 29.1, 28.5, 25.8. **IR (KBr) cm<sup>-1</sup>**: 3354.2, 3078.4, 2920.4, 2872.0, 1614.2, 1491.3, 1422.5, 1272.2, 1062.7, 749.2. **HRMS (ESI)**: calculated for C<sub>19</sub>H<sub>21</sub>ClNaO<sub>2</sub>S<sub>2</sub> [M+Na]<sup>+</sup>: 387.0620; **found**: 387.0624.

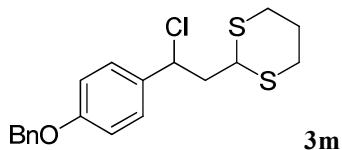

**<sup>1</sup>H NMR (300 MHz, CDCl<sub>3</sub>)**: δ = 7.42-6.92 (m, 9H), 5.17 (t, *J* = 9.0 Hz, 1H), 5.03 (s, 2H), 4.00 (t, *J* = 9.0 Hz, 1H), 2.84-2.78 (m, 4H), 2.62-2.34 (m, 2H), 2.07-1.81 (m, 2H). **<sup>13</sup>C NMR (75 MHz, CDCl<sub>3</sub>)**: δ = 158.7, 136.5, 132.7, 128.5, 128.2, 127.9, 127.3, 114.8, 69.8, 59.6, 44.7, 43.7, 29.3, 29.2, 25.7. **IR (KBr) cm<sup>-1</sup>**: 3361.7, 3057.4, 2933.6, 2889.5, 1594.2, 1498.0, 1398.5, 1262.1, 1049.8, 740.9. **HRMS (ESI)**: calculated for C<sub>19</sub>H<sub>21</sub>ClNaO<sub>2</sub>S<sub>2</sub> [M+Na]<sup>+</sup>: 387.0620; **found**: 387.0617.

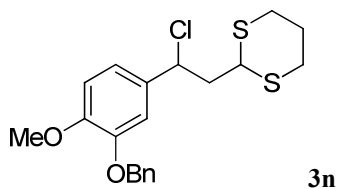

**<sup>1</sup>H NMR (300 MHz, CDCl<sub>3</sub>):**  $\delta$  = 7.46-6.83 (m, 8H), 5.17 (s, 2H), 5.11 (dd,  $J$  = 6.0, 9.0 Hz, 1H), 3.94 (dd,  $J$  = 6.0, 9.0 Hz, 1H), 3.87 (s, 3H), 2.85-2.73 (m, 4H), 2.57-2.29 (m, 2H), 2.12-1.84 (m, 2H). **<sup>13</sup>C NMR (75 MHz, CDCl<sub>3</sub>):**  $\delta$  = 149.7, 147.7, 136.6, 132.6, 128.4, 127.8, 127.4, 119.9, 112.6, 111.3, 70.9, 59.9, 44.7, 43.6, 29.3, 29.2, 26.8, 25.7. **IR (KBr) cm<sup>-1</sup>:** 3328.5, 2922.3, 2899.4, 1617.6, 1493.8, 1412.9, 1283.2, 1061.0, 751.4, 712.7. **HRMS (ESI):** calculated for C<sub>20</sub>H<sub>23</sub>ClNaO<sub>2</sub>S<sub>2</sub> [M+Na]<sup>+</sup>: 417.0726; **found:** 417.0727.

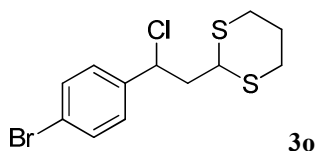

**<sup>1</sup>H NMR (400 MHz, CDCl<sub>3</sub>):**  $\delta$  = 7.49 (q,  $J$  = 1.6 Hz, 2H), 7.29 (d,  $J$  = 8.4 Hz, 2H), 5.15 (dd,  $J$  = 6.0, 8.4 Hz, 1H), 3.99 (dd,  $J$  = 6.8, 8.4 Hz, 1H), 2.87-2.78 (m, 4H), 2.57-2.34 (m, 2H), 2.13-1.85 (m, 2H). **<sup>13</sup>C NMR (100 MHz, CDCl<sub>3</sub>):**  $\delta$  = 139.5, 131.8, 128.7, 122.4, 58.8, 44.7, 43.6, 29.4, 29.2, 25.7. **IR (KBr) cm<sup>-1</sup>:** 3354.5, 2909.9, 2374.0, 1489.1, 1422.5, 1264.8, 1073.1, 1011.2, 738.0, 704.5. **HRMS (ESI):** calculated for C<sub>12</sub>H<sub>14</sub>BrClNaS<sub>2</sub> [M+Na]<sup>+</sup>: 358.9307; **found:** 358.9310.

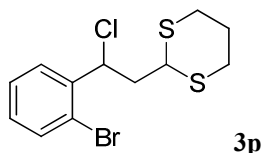

**<sup>1</sup>H NMR (400 MHz, CDCl<sub>3</sub>):**  $\delta$  = 7.54-7.06 (m, 4H), 5.63 (dd,  $J$  = 4.0, 12.0 Hz, 1H), 4.15 (dd,  $J$  = 8.0, 12.0 Hz, 1H), 2.81-2.70 (m, 4H), 2.38-1.95 (m, 2H), 1.86-1.80 (m, 2H). **<sup>13</sup>C NMR (100 MHz, CDCl<sub>3</sub>):**  $\delta$  = 139.4, 132.7, 129.6, 128.4, 127.8, 122.4, 58.6, 43.9, 31.7, 29.4, 29.1, 26.3. **IR (KBr) cm<sup>-1</sup>:** 3347.2, 2915.2, 3405.9, 1497.6, 1403.8, 1255.7, 1088.0, 988.5, 745.6, 705.1. **HRMS (ESI):** calculated for C<sub>12</sub>H<sub>14</sub>BrClNaS<sub>2</sub> [M+Na]<sup>+</sup>: 358.9307; **found:** 358.9308.

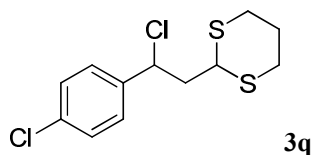

**<sup>1</sup>H NMR (400 MHz, CDCl<sub>3</sub>):**  $\delta$  = 7.345 (s, 4H), 5.16 (dd,  $J$  = 6.0, 8.8 Hz, 1H), 4.00 (dd,  $J$  = 6.8, 8.4 Hz, 1H), 2.85-2.82 (m, 4H), 2.58-2.34 (m, 2H), 2.14-1.85 (m, 2H). **<sup>13</sup>C NMR (100 MHz, CDCl<sub>3</sub>):**  $\delta$  = 139.0, 134.3, 128.9, 128.4, 58.8, 44.8, 43.6, 29.5, 29.3, 25.7. **IR (KBr) cm<sup>-1</sup>:** 3386.6, 2907.7, 1596.4, 1492.7, 1422.7, 1264.6, 1092.2, 738.3, 703.8. **HRMS (ESI):** calculated for C<sub>12</sub>H<sub>14</sub>Cl<sub>2</sub>NaS<sub>2</sub> [M+Na]<sup>+</sup>: 314.9812; **found:** 314.9810.

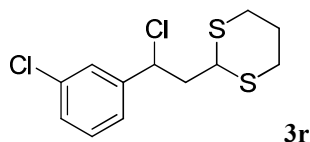

**<sup>1</sup>H NMR (400 MHz, CDCl<sub>3</sub>):**  $\delta$  = 7.41-7.28 (m, 4H), 5.15 (dd,  $J$  = 4.0, 8.0 Hz, 1H), 4.03 (dd,  $J$  = 8.0, 12.0 Hz, 1H), 2.88-2.79 (m, 4H), 2.57-2.50 (m, 2H), 2.42-1.86 (m, 2H). **<sup>13</sup>C NMR (100 MHz,**

**CDCl<sub>3</sub>**):  $\delta$  = 142.4, 134.4, 129.9, 128.7, 127.2, 125.2, 58.7, 44.7, 43.5, 29.4, 29.2, 25.7. **IR (KBr) cm<sup>-1</sup>**: 3415.7, 2909.7, 1607.0, 1488.4, 1417.5, 1270.9, 1096.3, 738.9, 722.6. **HRMS (ESI)**: calculated for C<sub>12</sub>H<sub>14</sub>Cl<sub>2</sub>NaS<sub>2</sub> [M+Na]<sup>+</sup>: 314.9812; **found**: 314.9813.

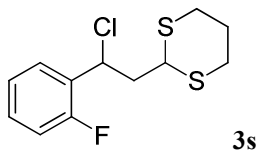

**<sup>1</sup>H NMR (400 MHz, CDCl<sub>3</sub>)**:  $\delta$  = 7.52-7.05 (m, 4H), 5.54 (dd,  $J$  = 8.0, 12.0 Hz, 1H), 4.15 (dd,  $J$  = 8.0, 12.0 Hz, 1H), 2.92-2.81 (m, 4H), 2.58-2.47 (m, 2H), 2.14-1.90 (m, 2H). **<sup>13</sup>C NMR (100 MHz, CDCl<sub>3</sub>)**:  $\delta$  = 160.7, 130.1, 128.3, 127.7, 124.5, 115.8, 52.8, 48.1, 43.5, 28.9, 28.8, 25.7. **IR (KBr) cm<sup>-1</sup>**: 3327.3, 2892.4, 2438.7, 1500.3, 1464.5, 1276.2, 1099.1, 735.2, 684.2. **HRMS (ESI)**: calculated for C<sub>12</sub>H<sub>14</sub>ClFNaS<sub>2</sub> [M+Na]<sup>+</sup>: 299.0107; **found**: 299.0109.

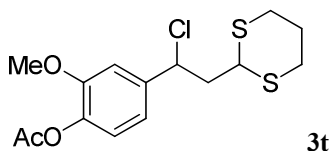

**<sup>1</sup>H NMR (400 MHz, CDCl<sub>3</sub>)**:  $\delta$  = 7.02-6.97 (m, 3H), 5.18 (dd,  $J$  = 4.0, 8.0 Hz, 1H), 4.05, (t,  $J$  = 4.0 Hz, 1H), 3.83 (s, 3H), 2.82 (d,  $J$  = 4.0 Hz, 4H), 2.55-2.42 (m, 2H), 2.30 (s, 3H), 2.10-1.87 (m, 2H). **<sup>13</sup>C NMR (100 MHz, CDCl<sub>3</sub>)**:  $\delta$  = 168.6, 150.9, 139.5, 139.1, 122.6, 119.0, 110.9, 59.3, 55.7, 44.7, 43.3, 29.1, 28.9, 25.5, 20.4. **IR (KBr) cm<sup>-1</sup>**: 3356.2, 2917.2, 1613.6, 1508.1, 1472.5, 1270.2, 1049.9, 736.7. **HRMS (ESI)**: calculated for C<sub>15</sub>H<sub>19</sub>ClNaO<sub>3</sub>S<sub>2</sub> [M+Na]<sup>+</sup>: 369.0362; **found**: 369.0359.

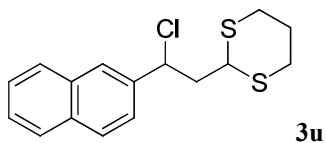

**<sup>1</sup>H NMR (400 MHz, CDCl<sub>3</sub>)**:  $\delta$  = 7.83-7.46 (m, 7H), 5.37 (t,  $J$  = 12.0 Hz, 1H), 4.03 (t,  $J$  = 8.0 Hz, 1H), 2.82 (d,  $J$  = 20.0 Hz, 4H), 2.72-2.47 (m, 2H), 2.06-1.84 (m, 2H). **<sup>13</sup>C NMR (100 MHz, CDCl<sub>3</sub>)**:  $\delta$  = 137.5, 133.1, 132.8, 128.8, 128.0, 127.6, 126.5, 126.4, 126.1, 124.4, 60.0, 44.6, 43.7, 29.3, 29.2, 25.7. **IR(KBr)cm<sup>-1</sup>**: 3055.3, 1647.9, 1589.6, 1469.1, 1451.7, 1404.9, 1318.3, 1293.3, 1238.4, 1179.1, 1158.1, 1116.6, 737.3. **HRMS (ESI)**: calculated for C<sub>16</sub>H<sub>17</sub>ClNaS<sub>2</sub> [M+Na]<sup>+</sup>: 331.0358; **found**: 331.0357.

## 10. Copies of <sup>1</sup>H and <sup>13</sup>C NMR Spectra

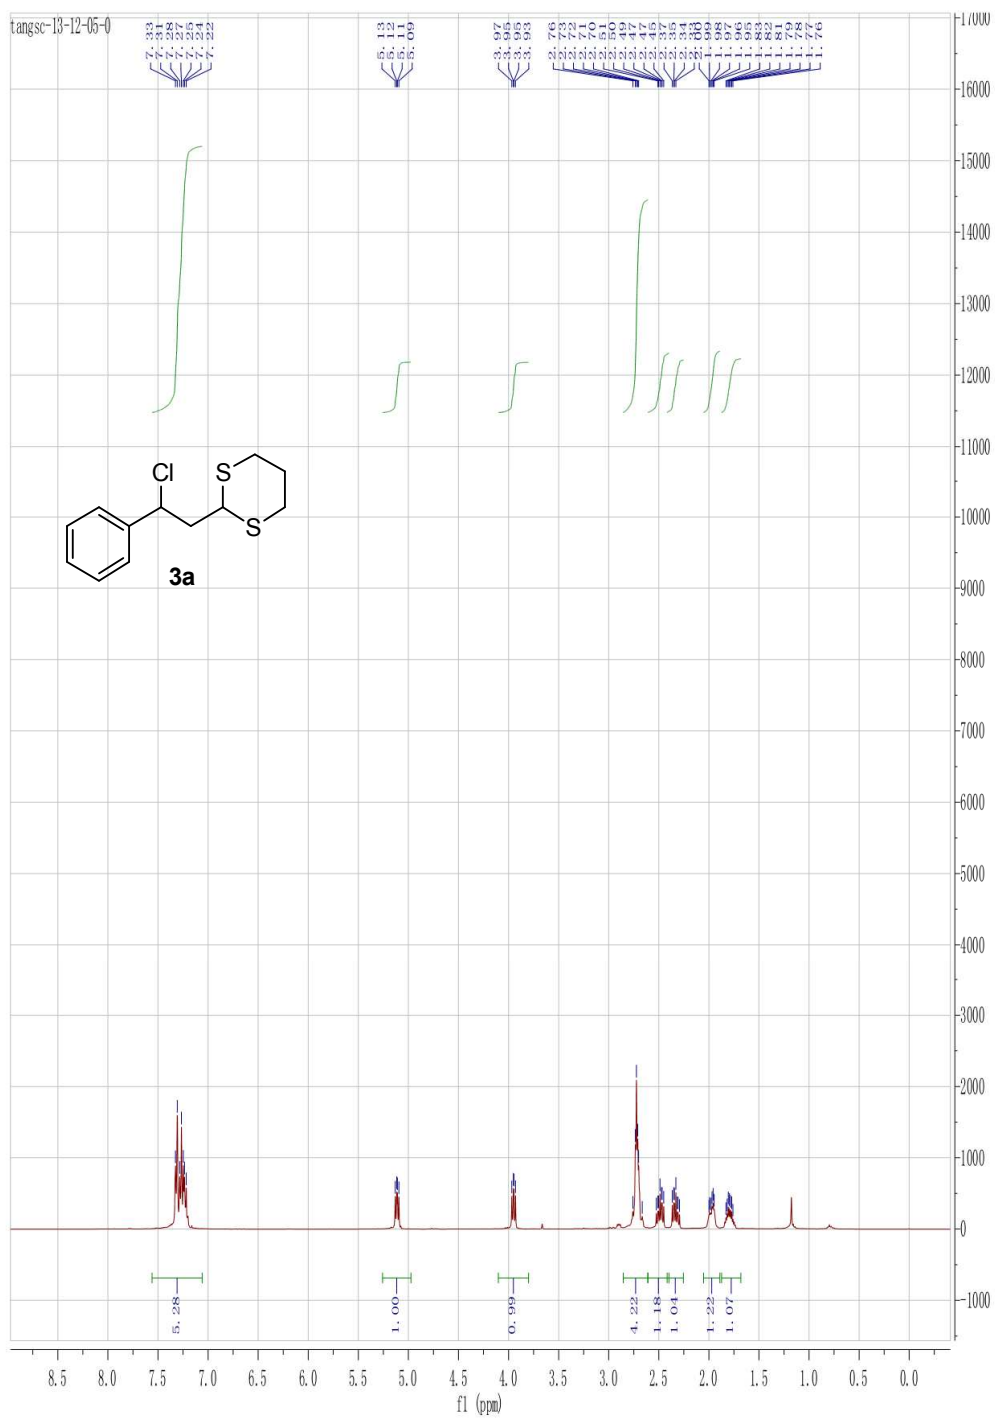

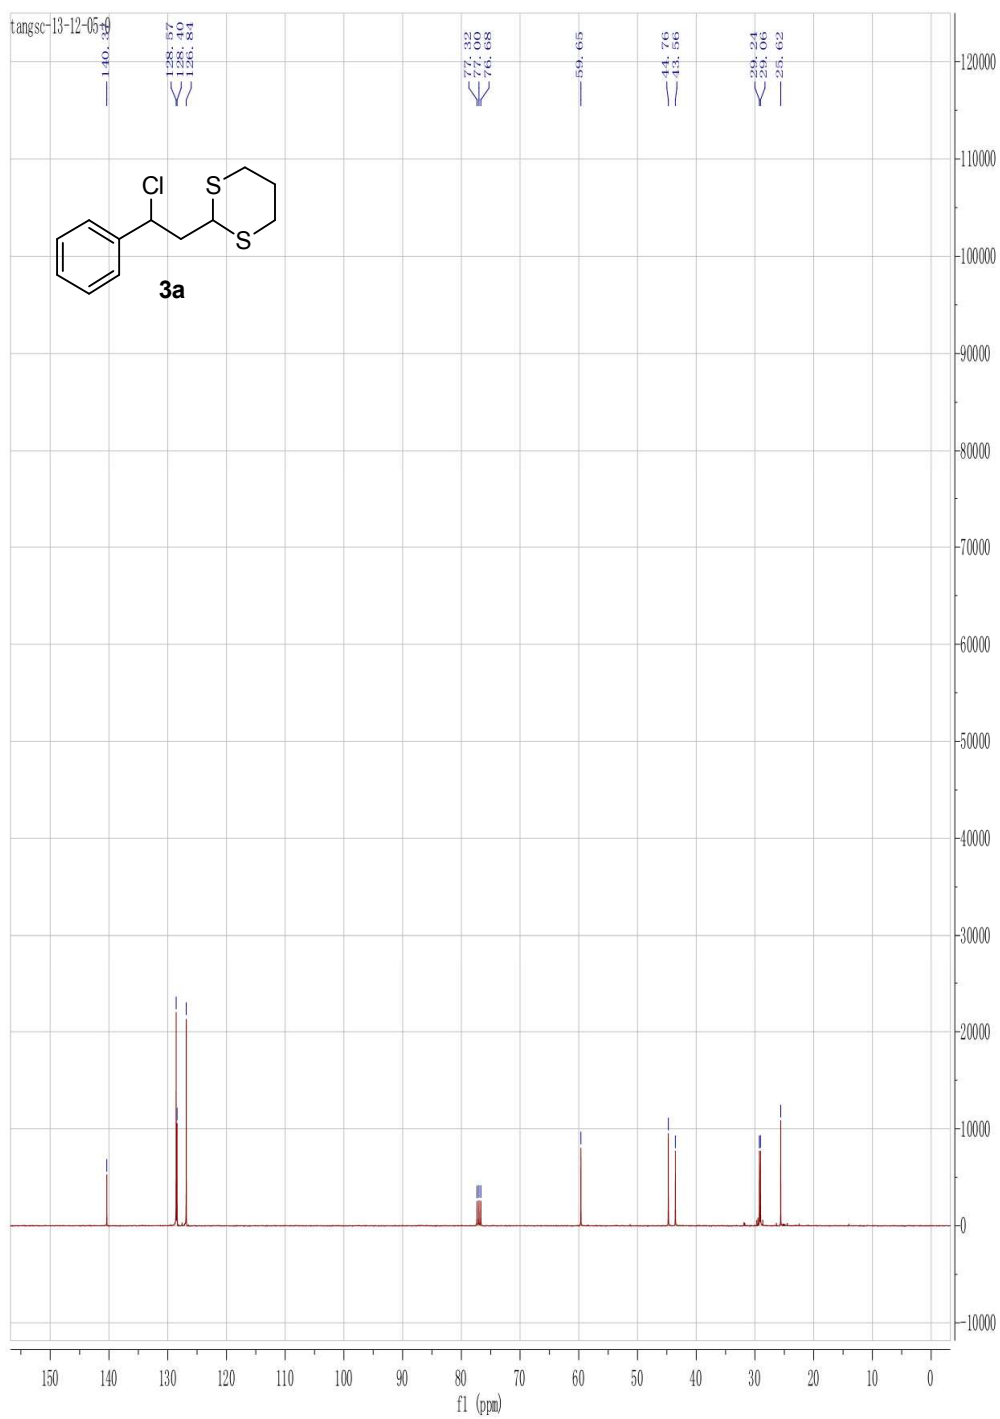

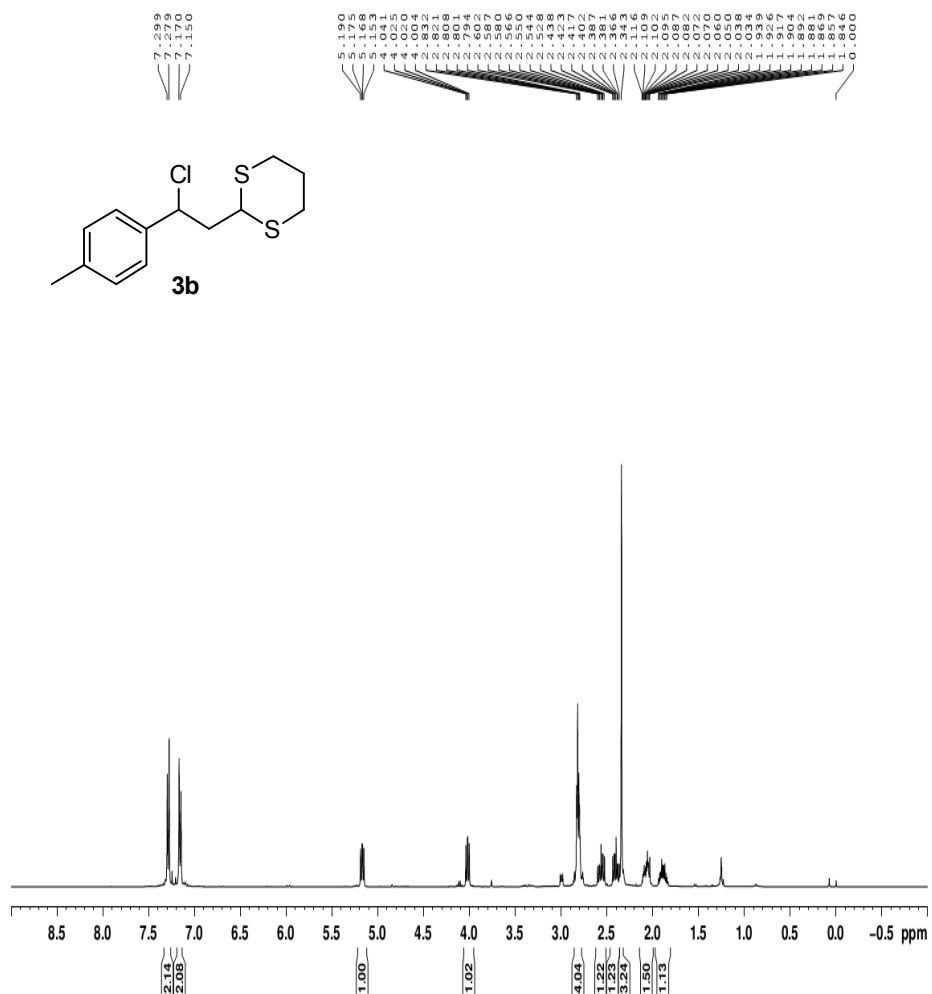

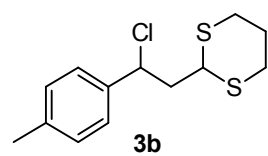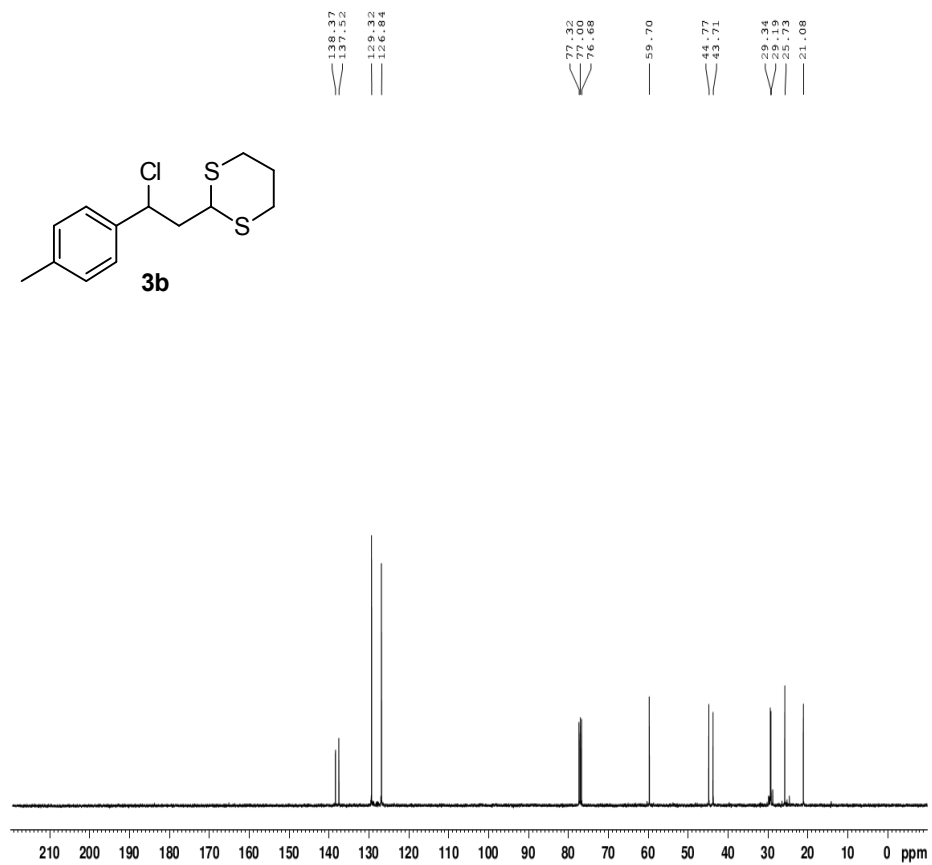

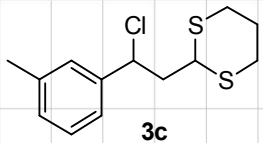



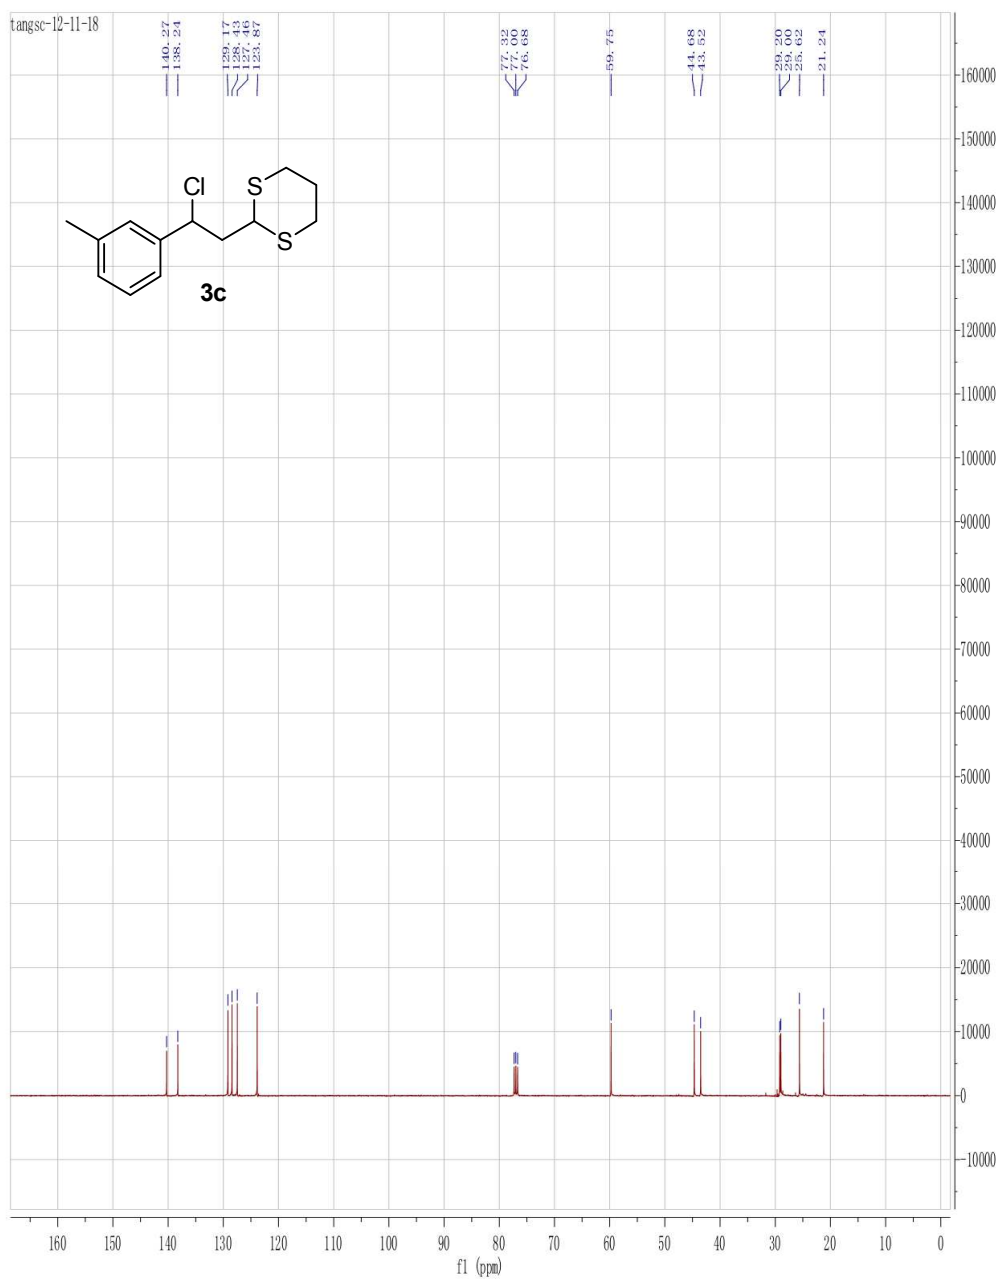

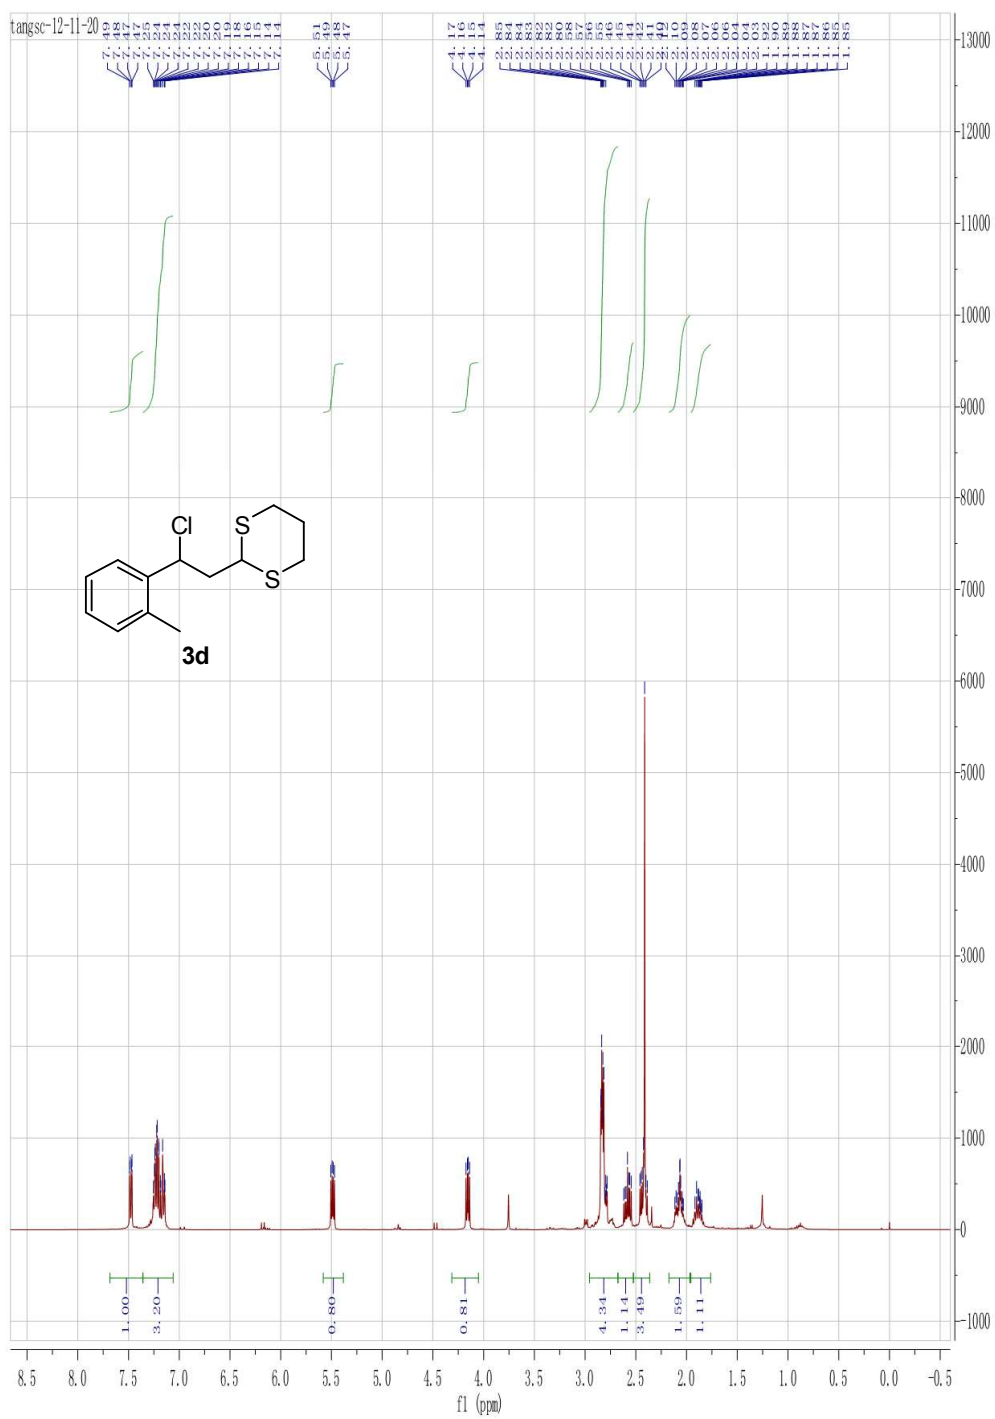

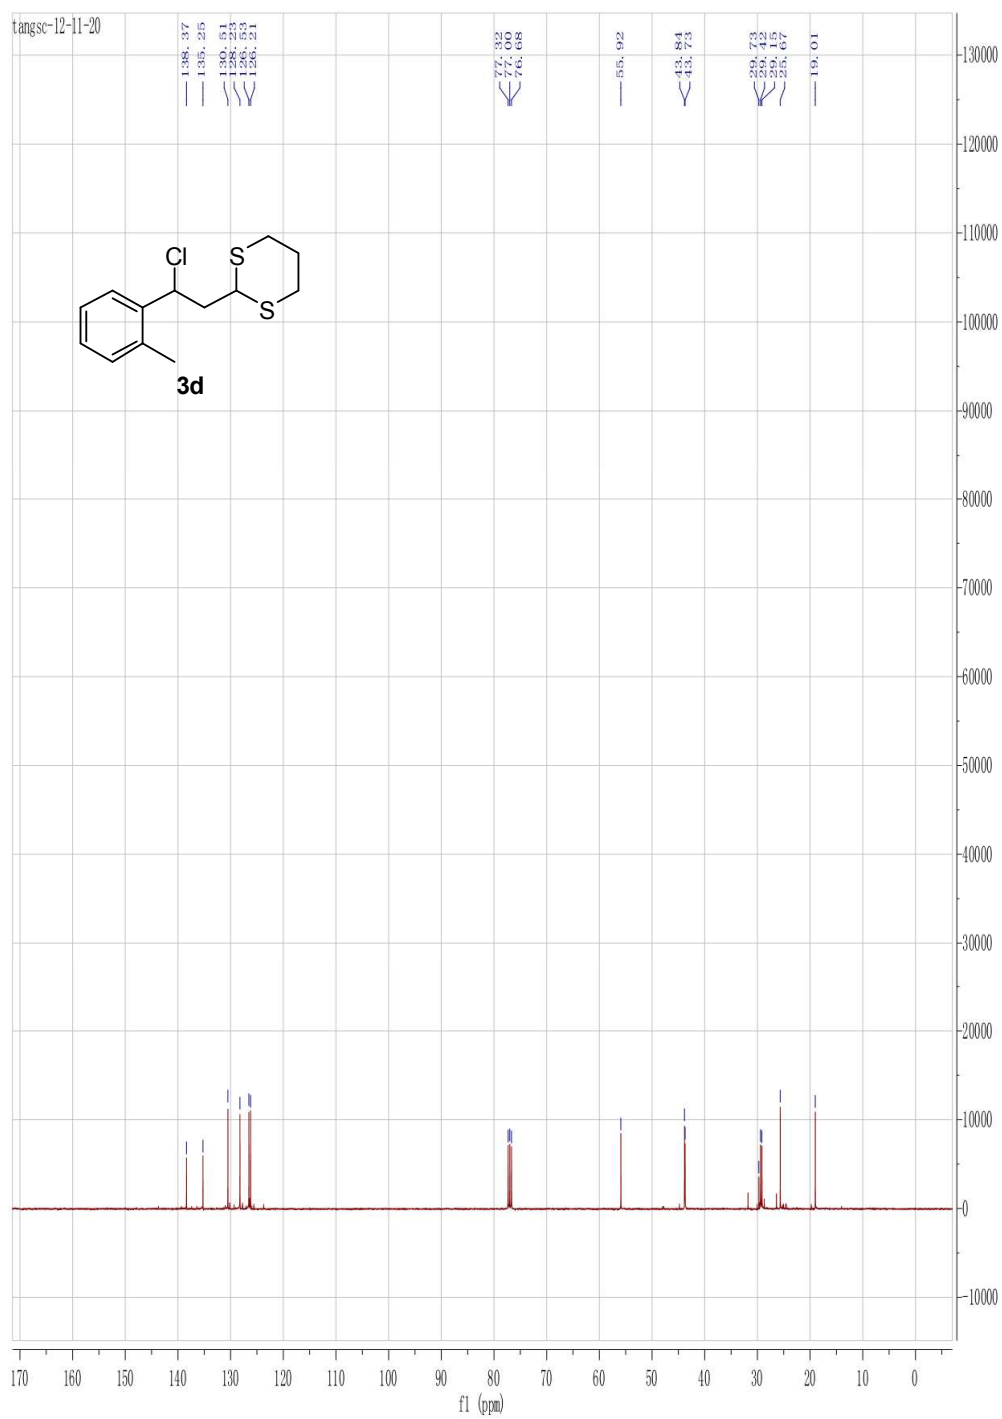

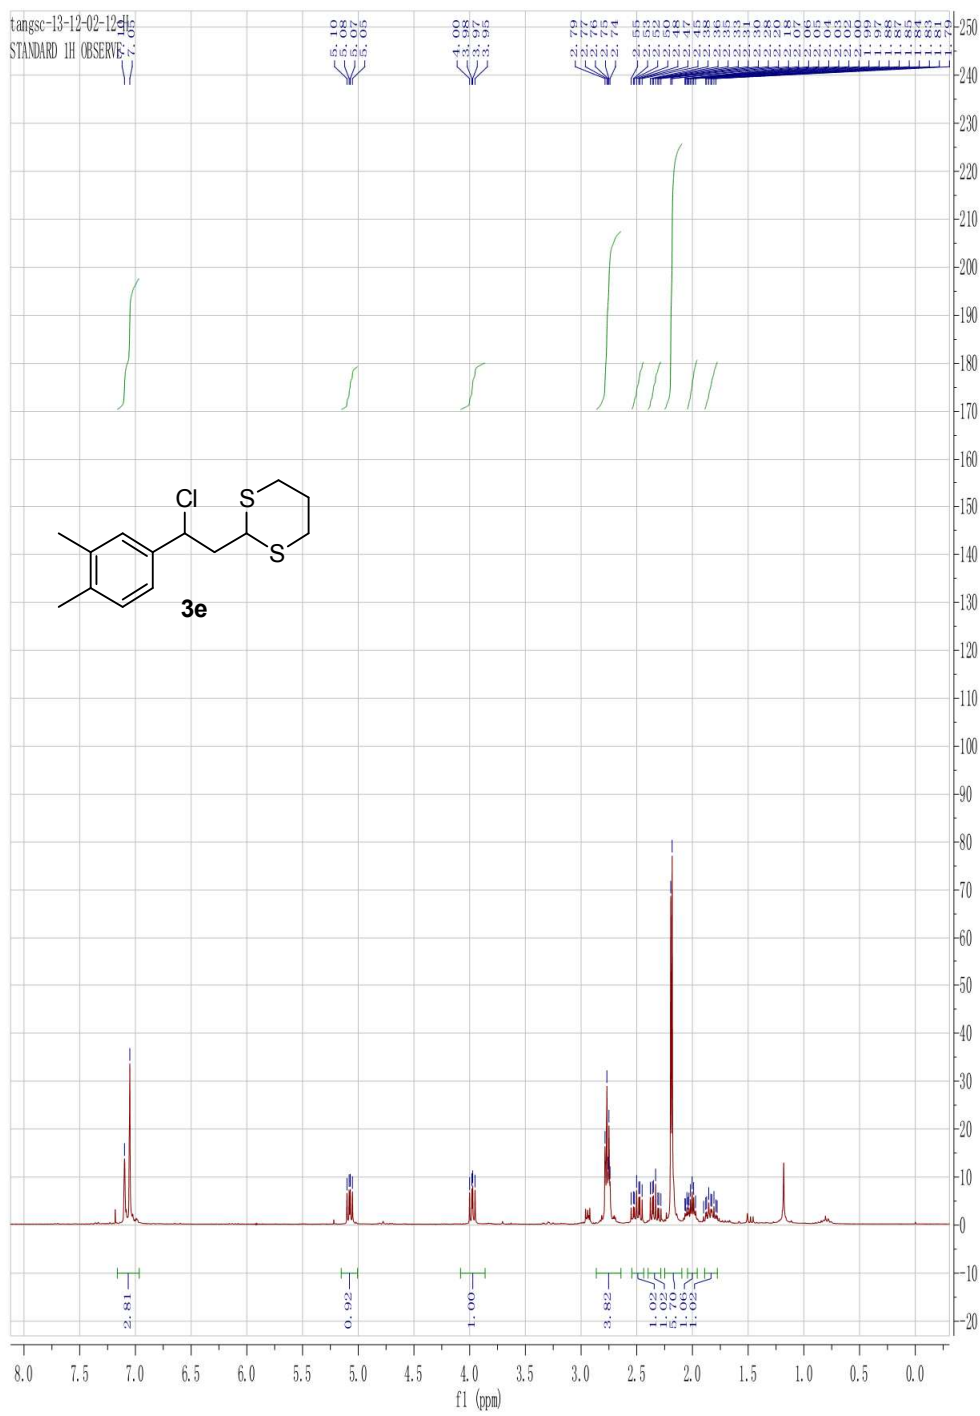

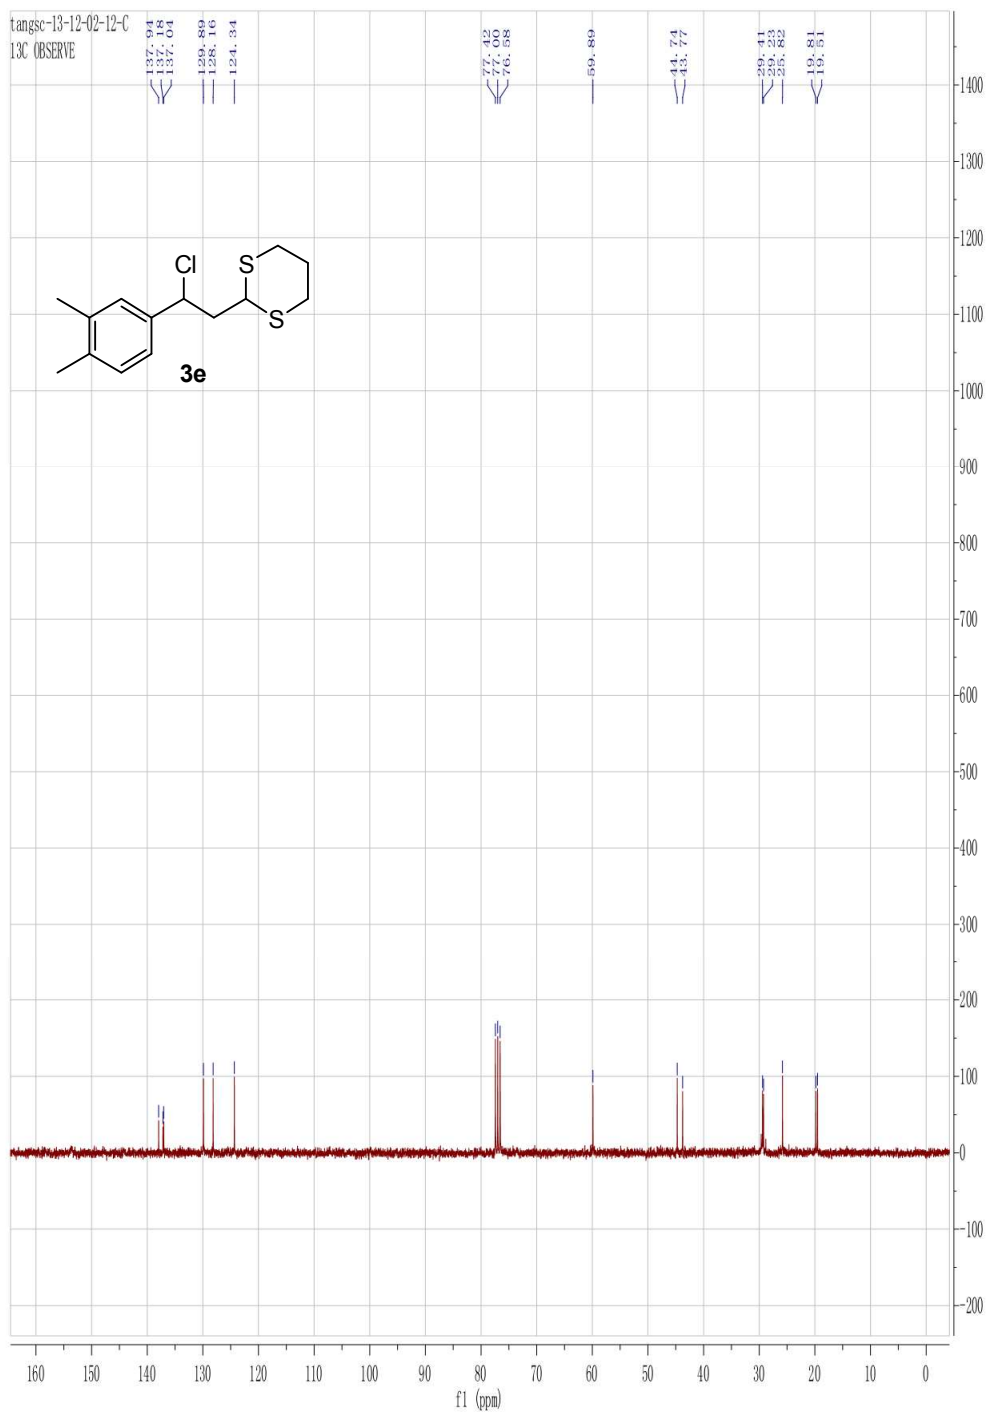

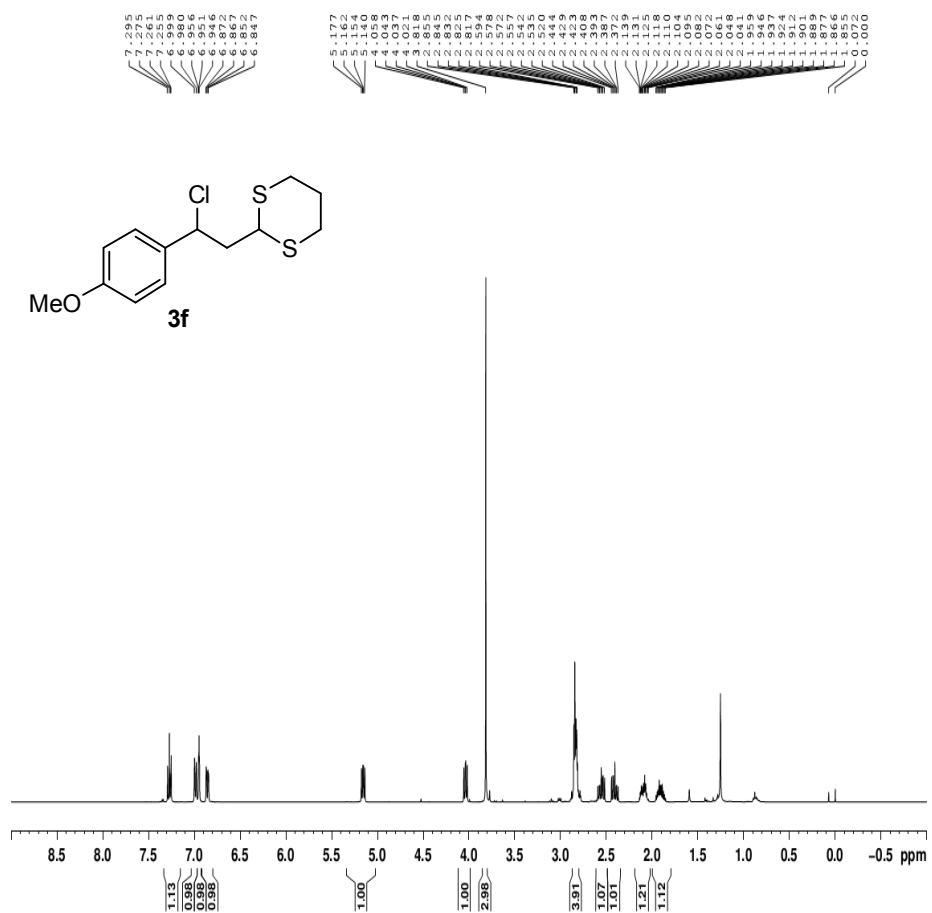

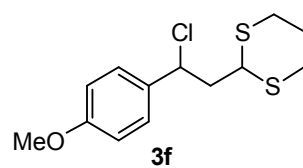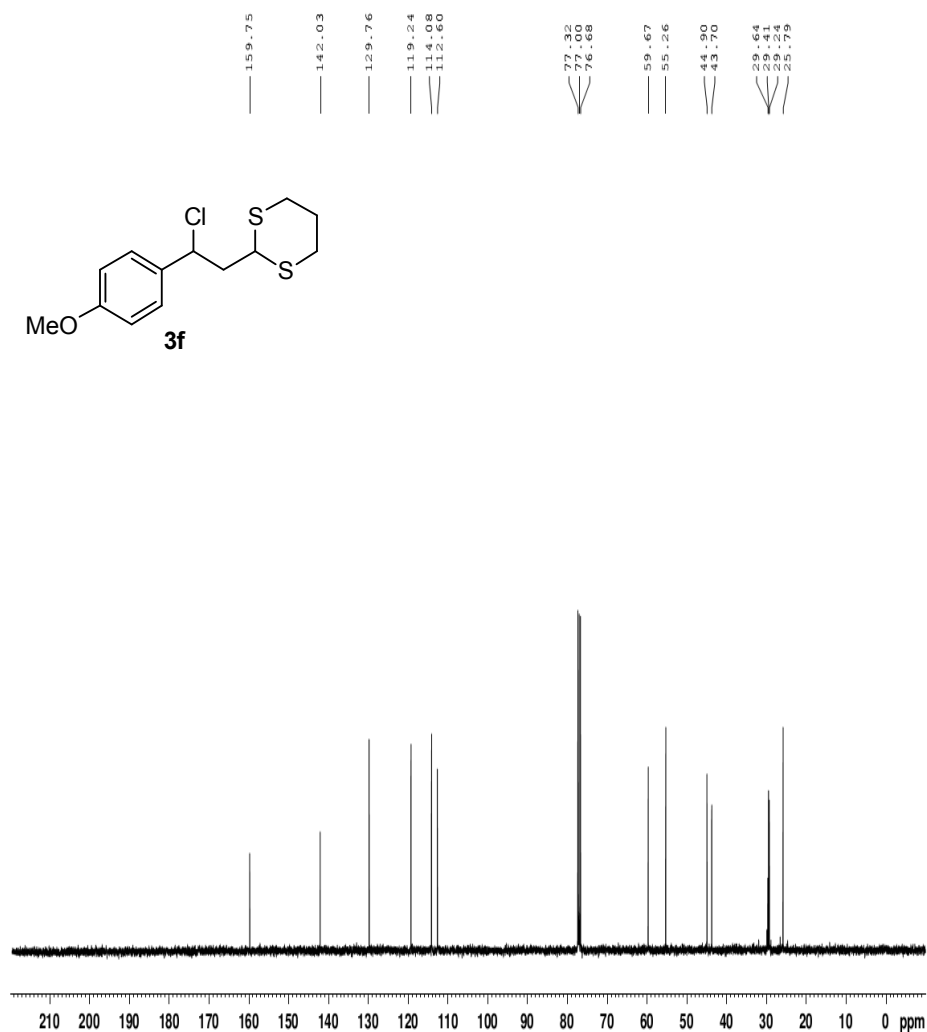

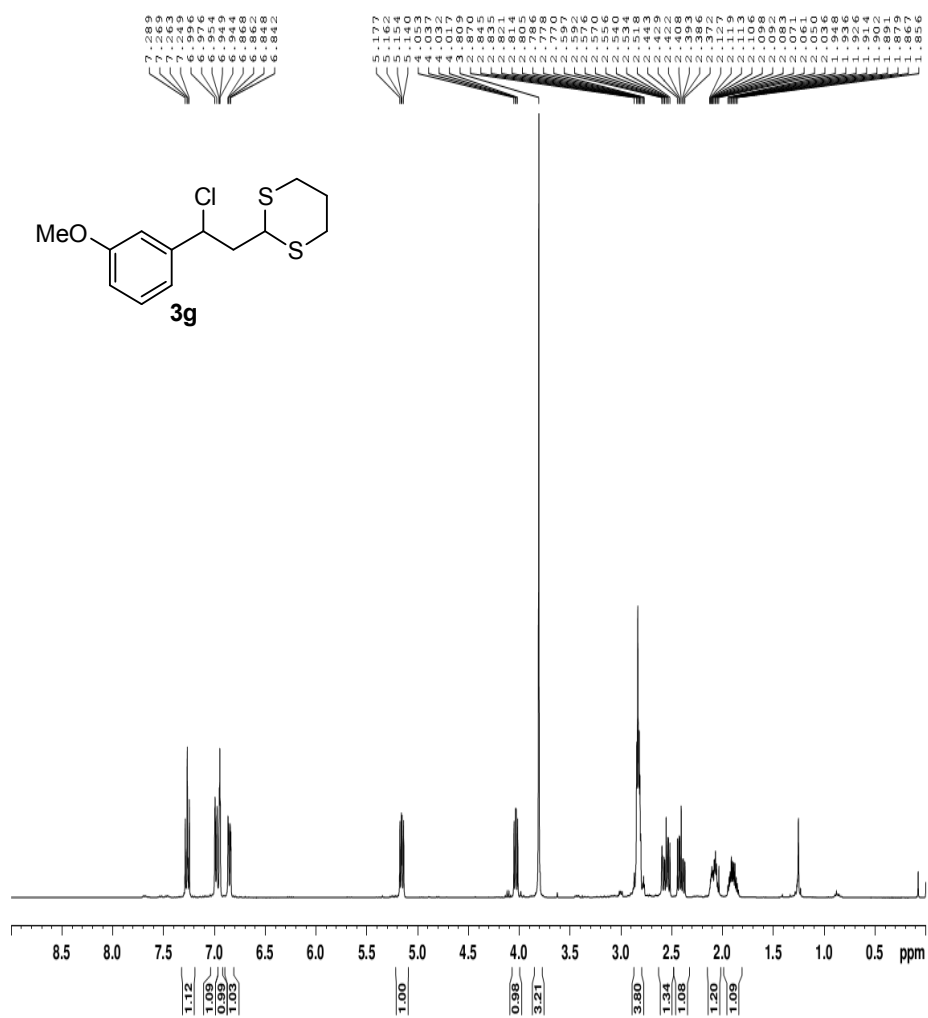



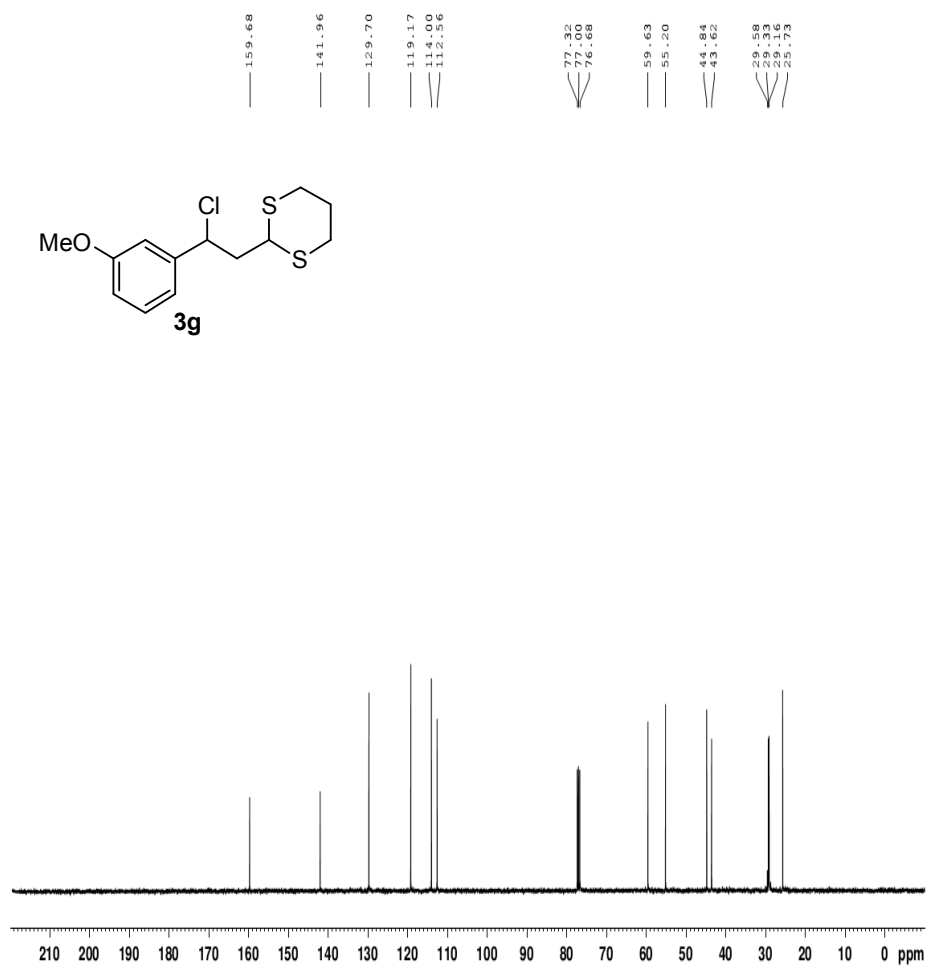

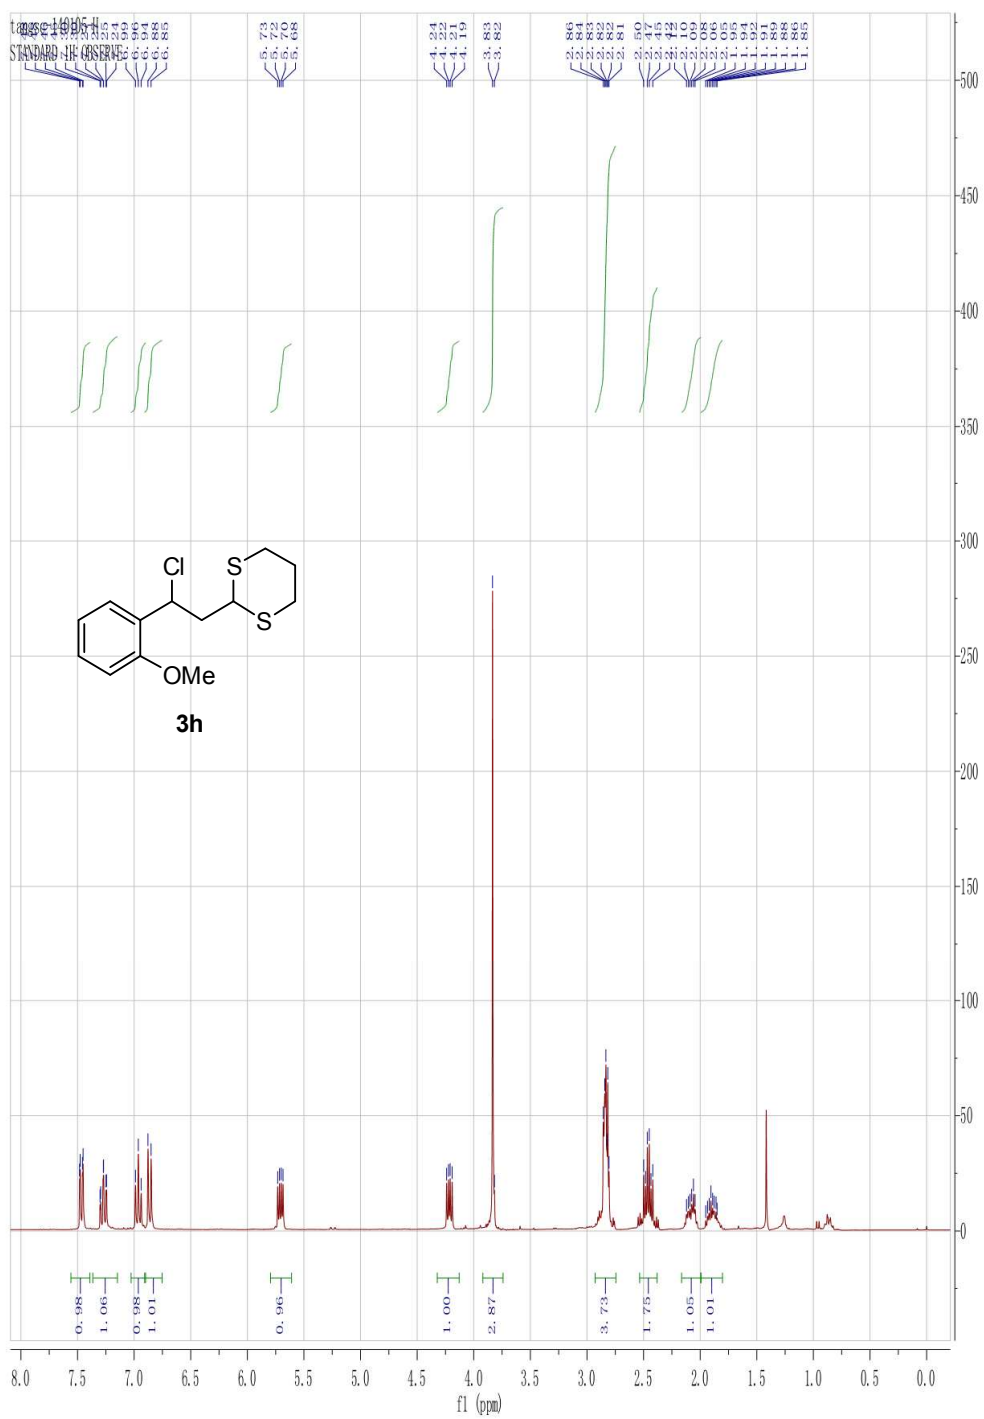

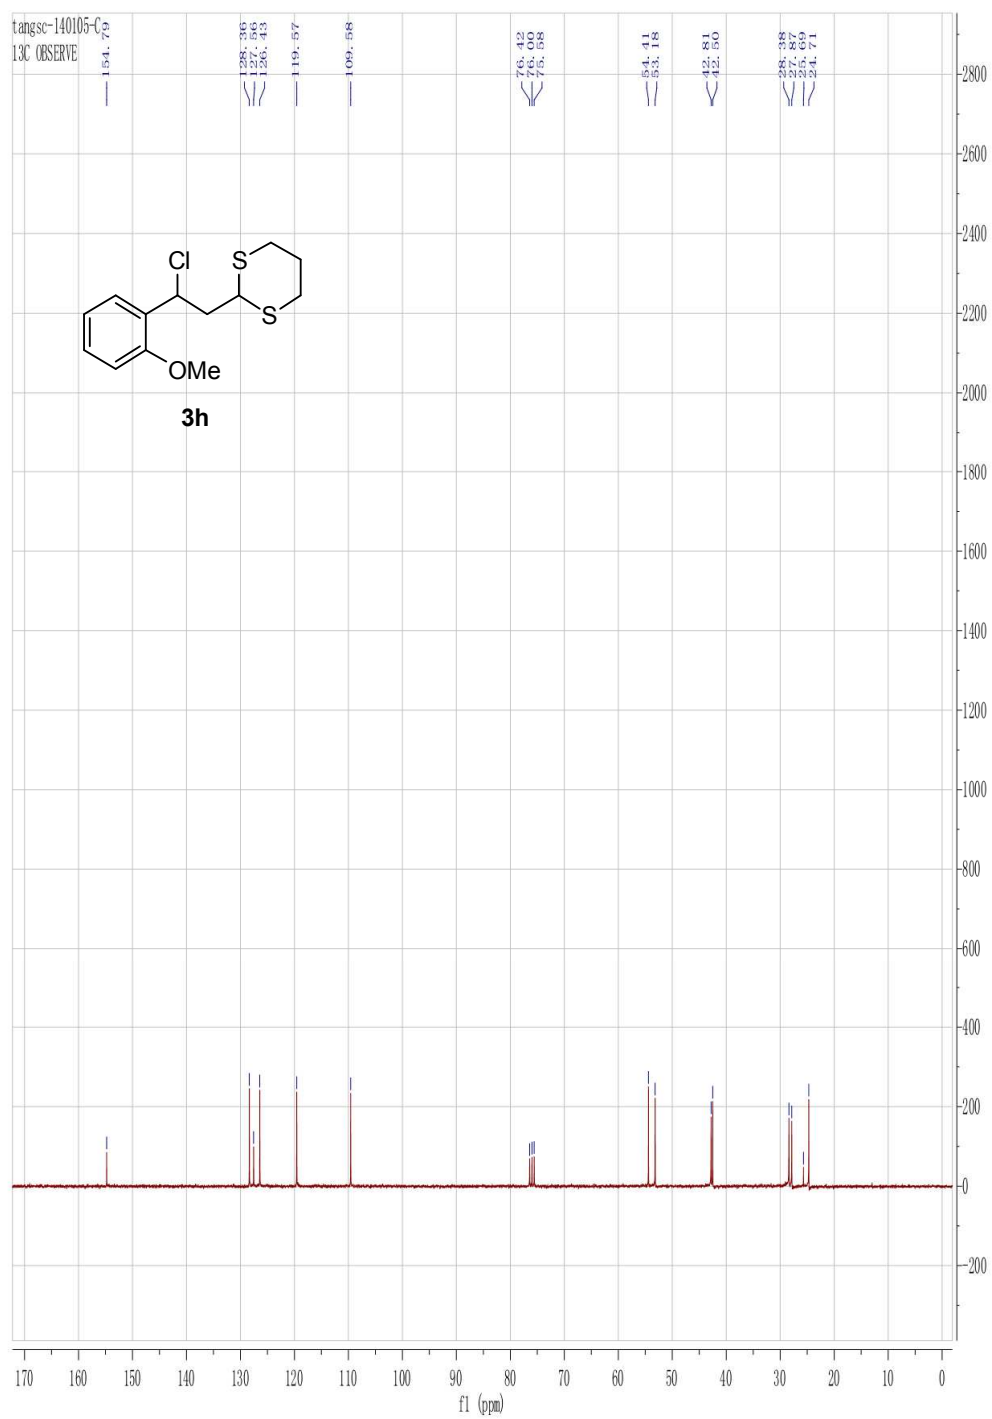

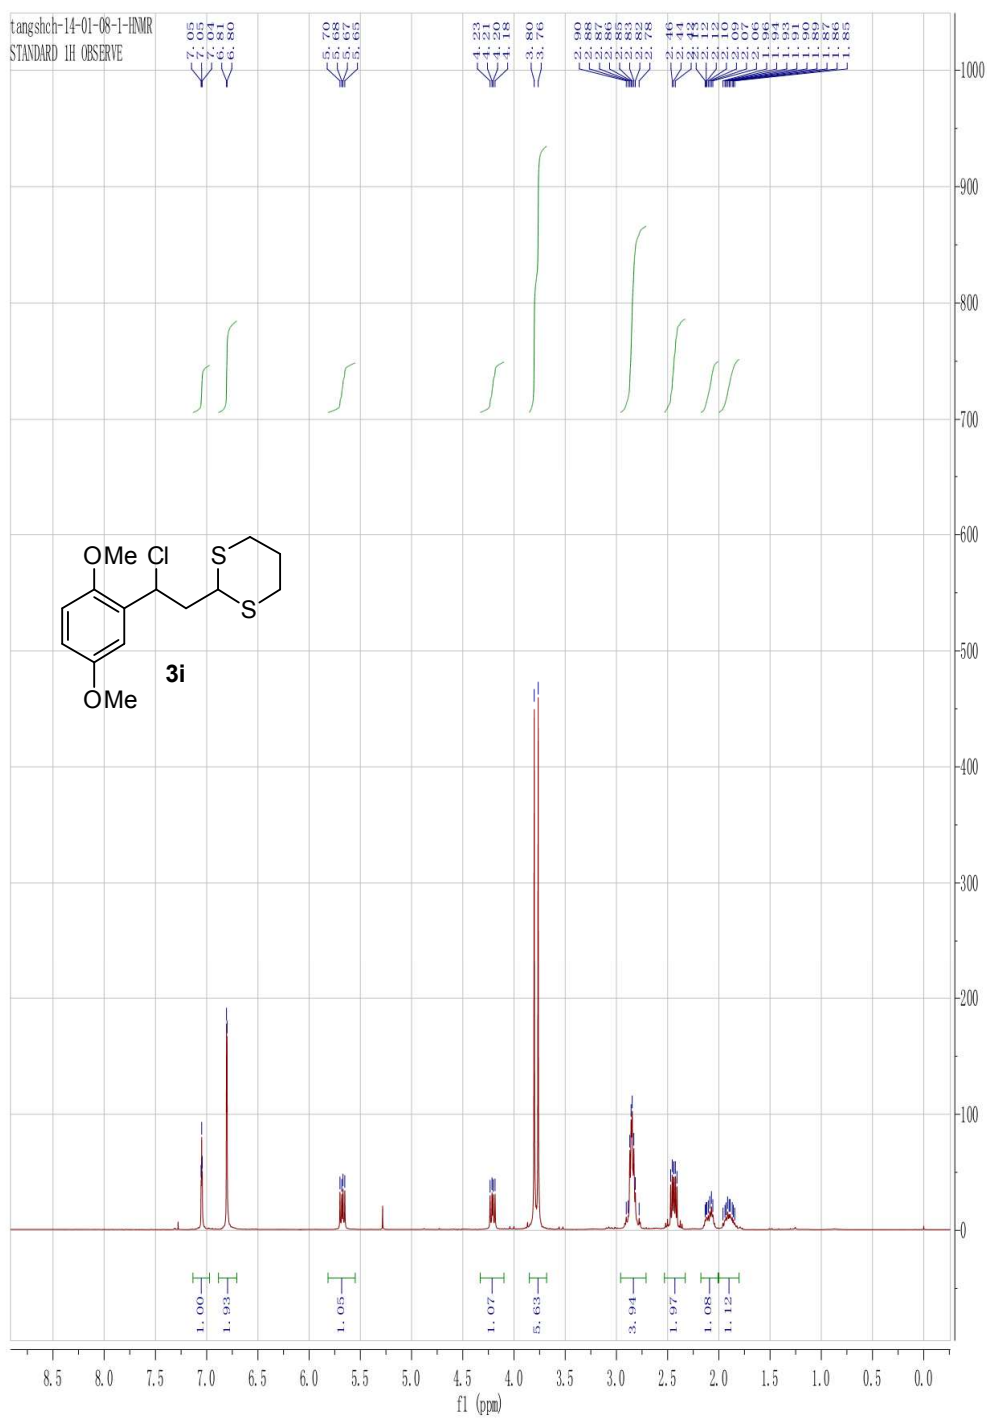

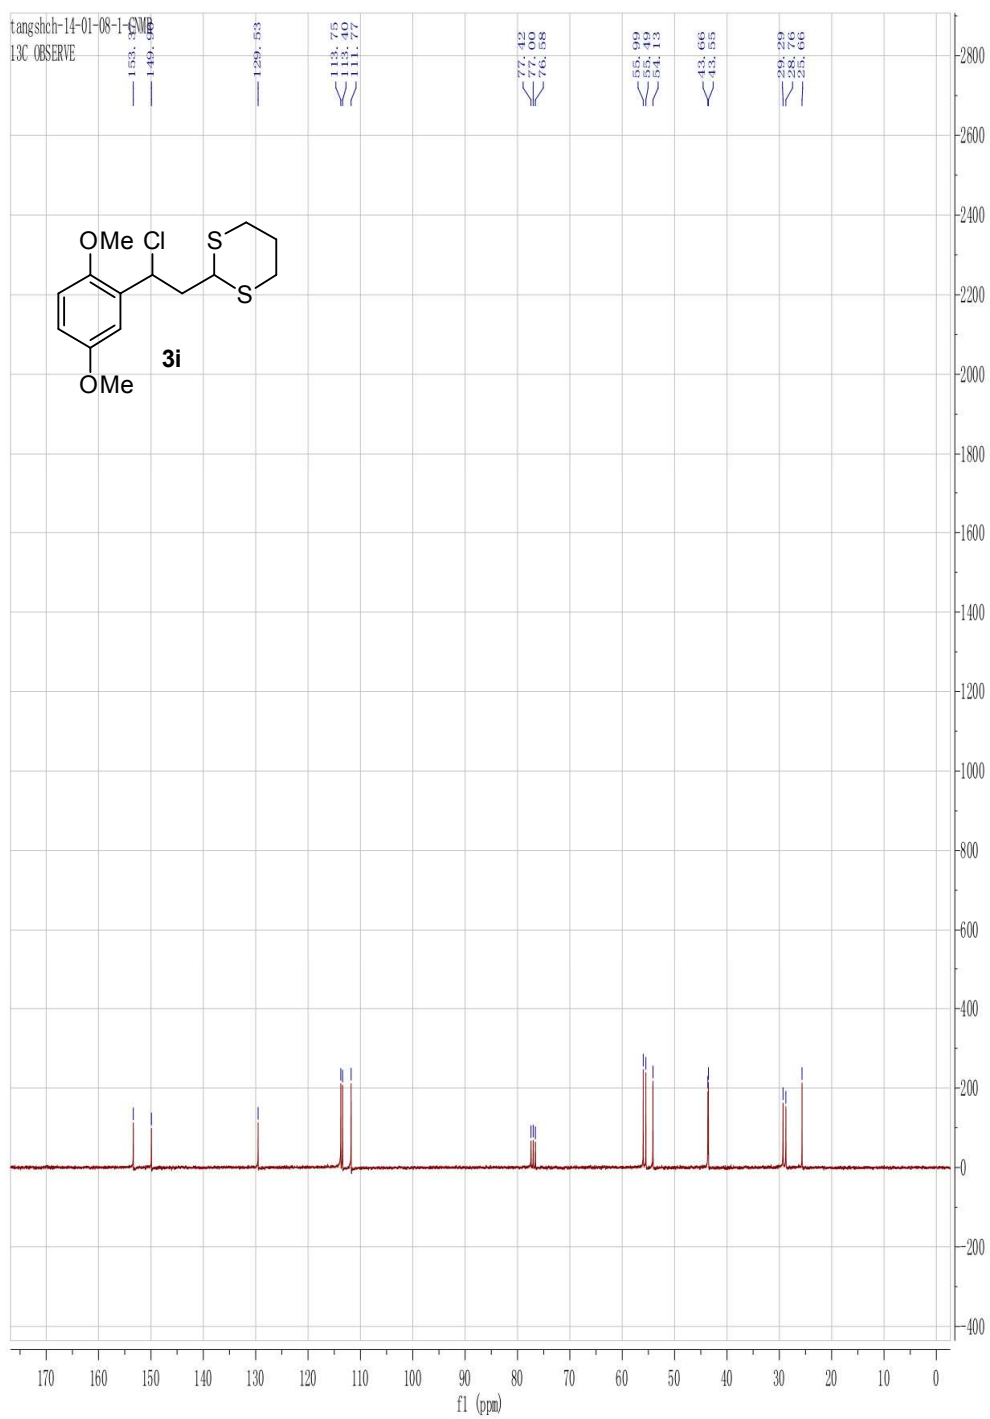

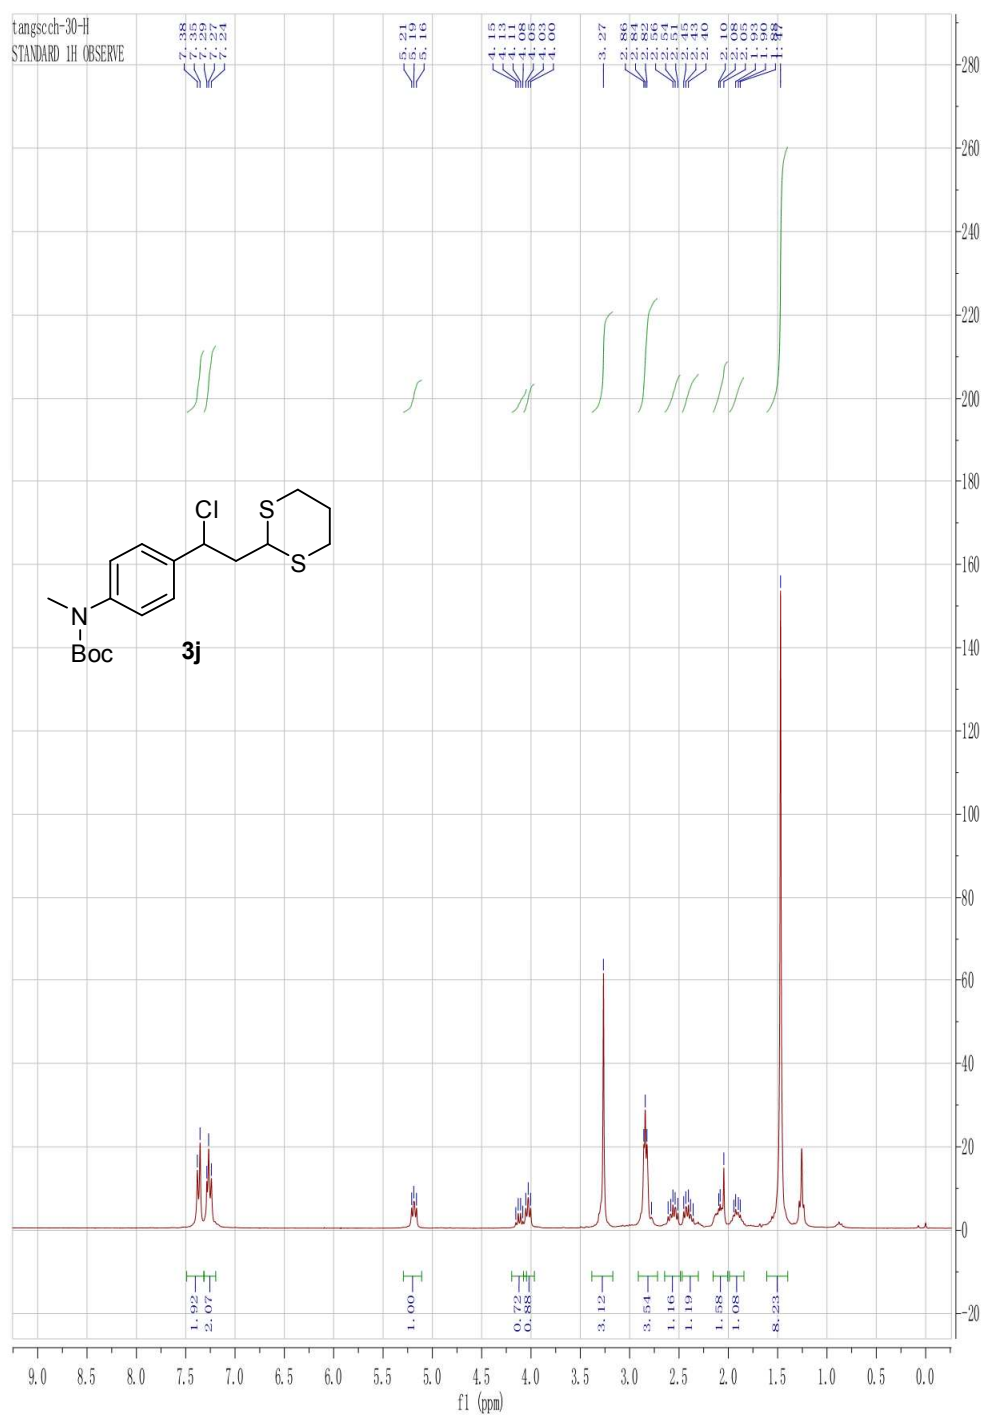

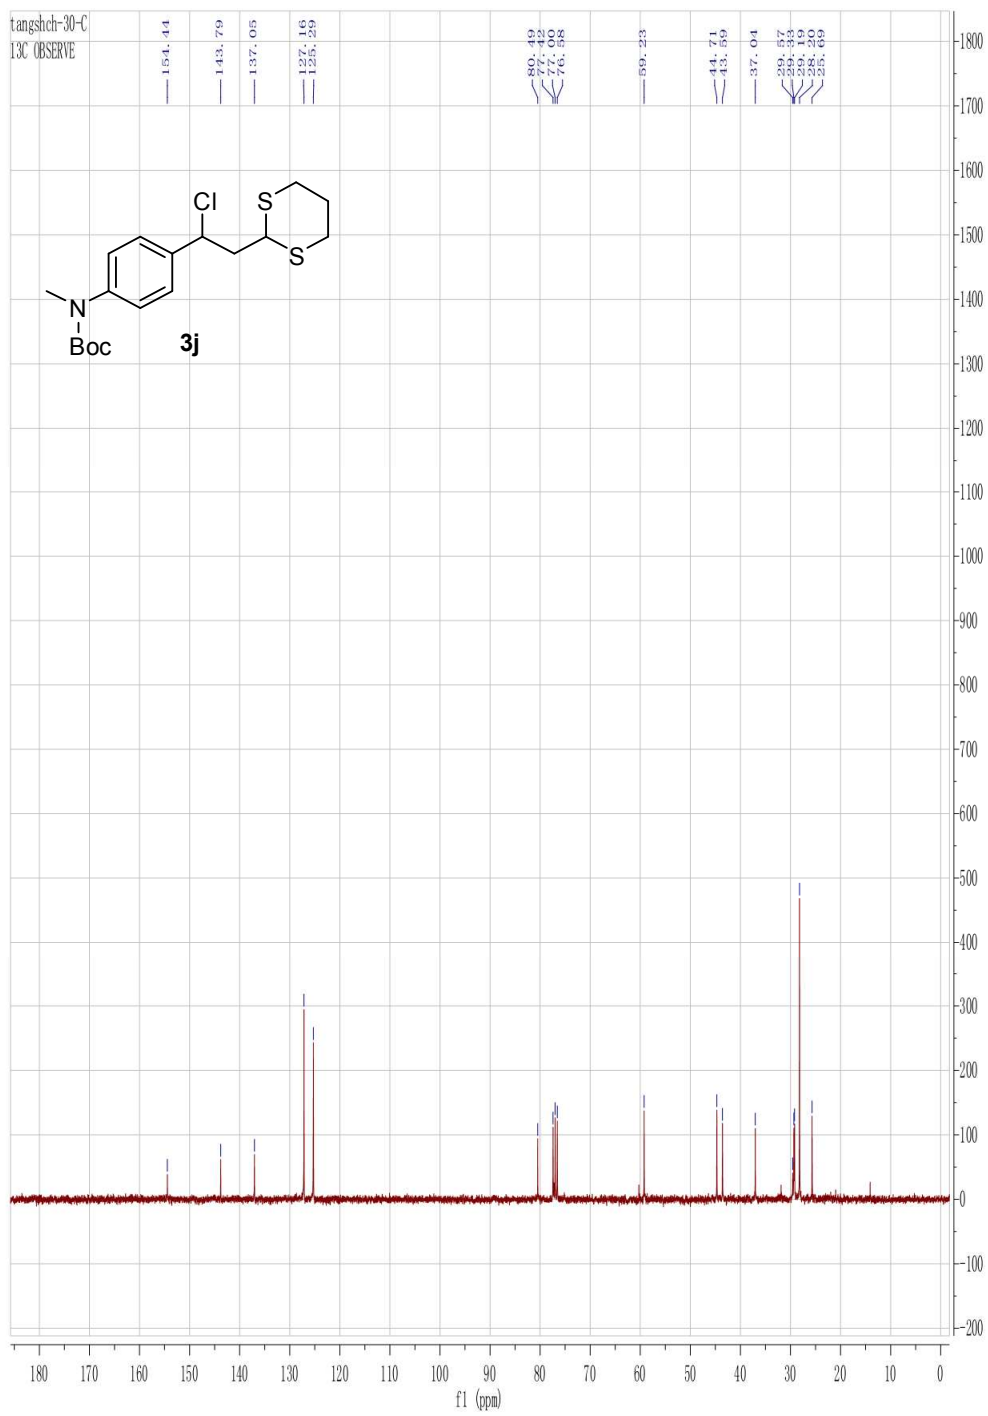

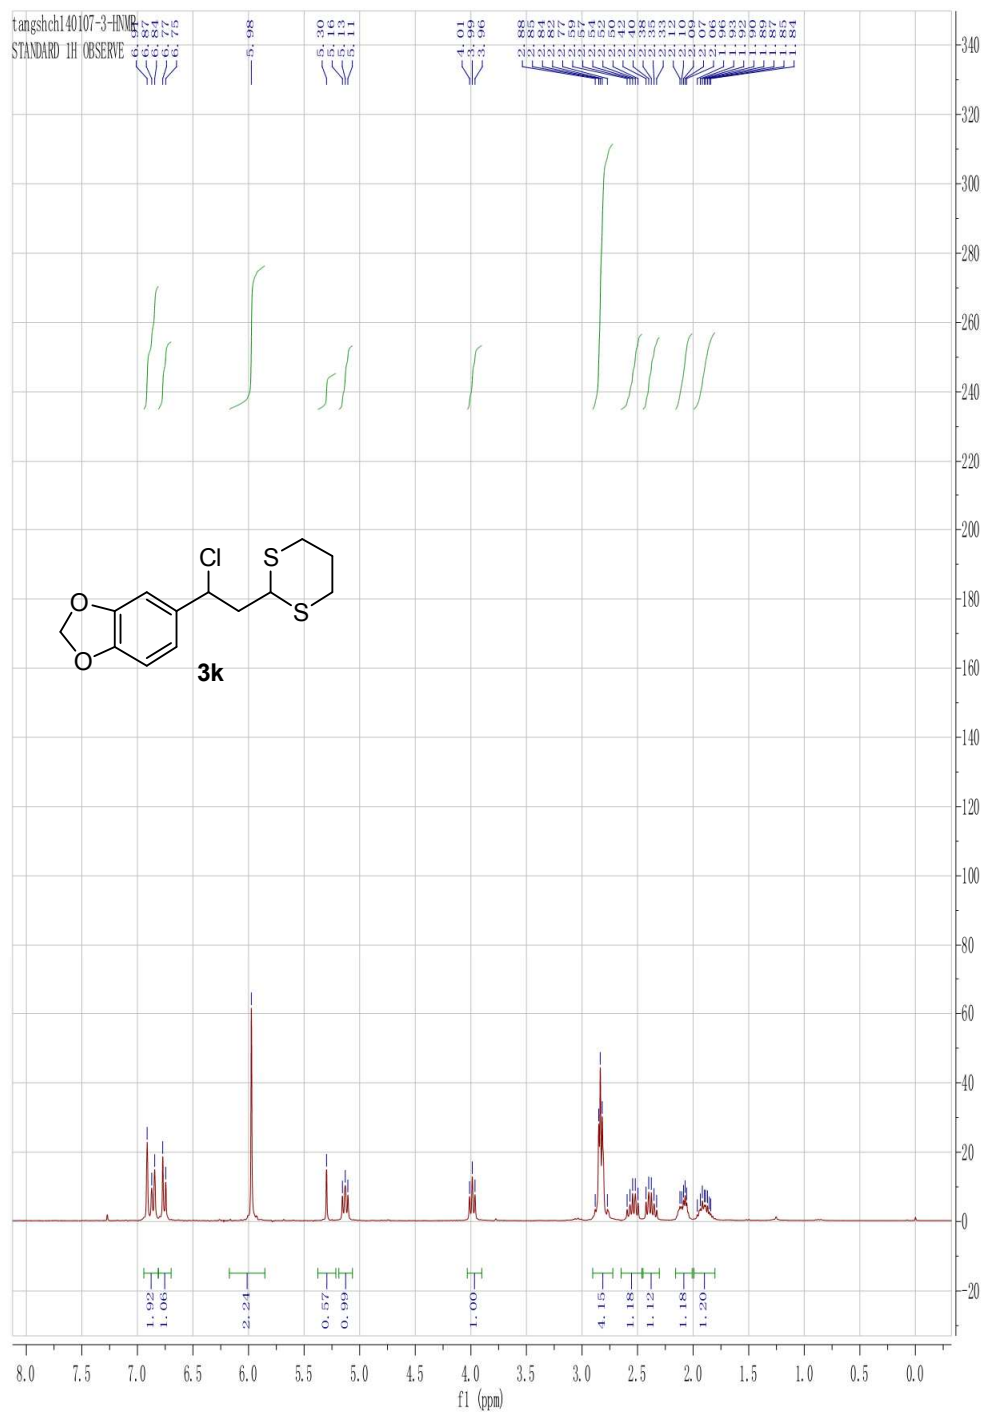



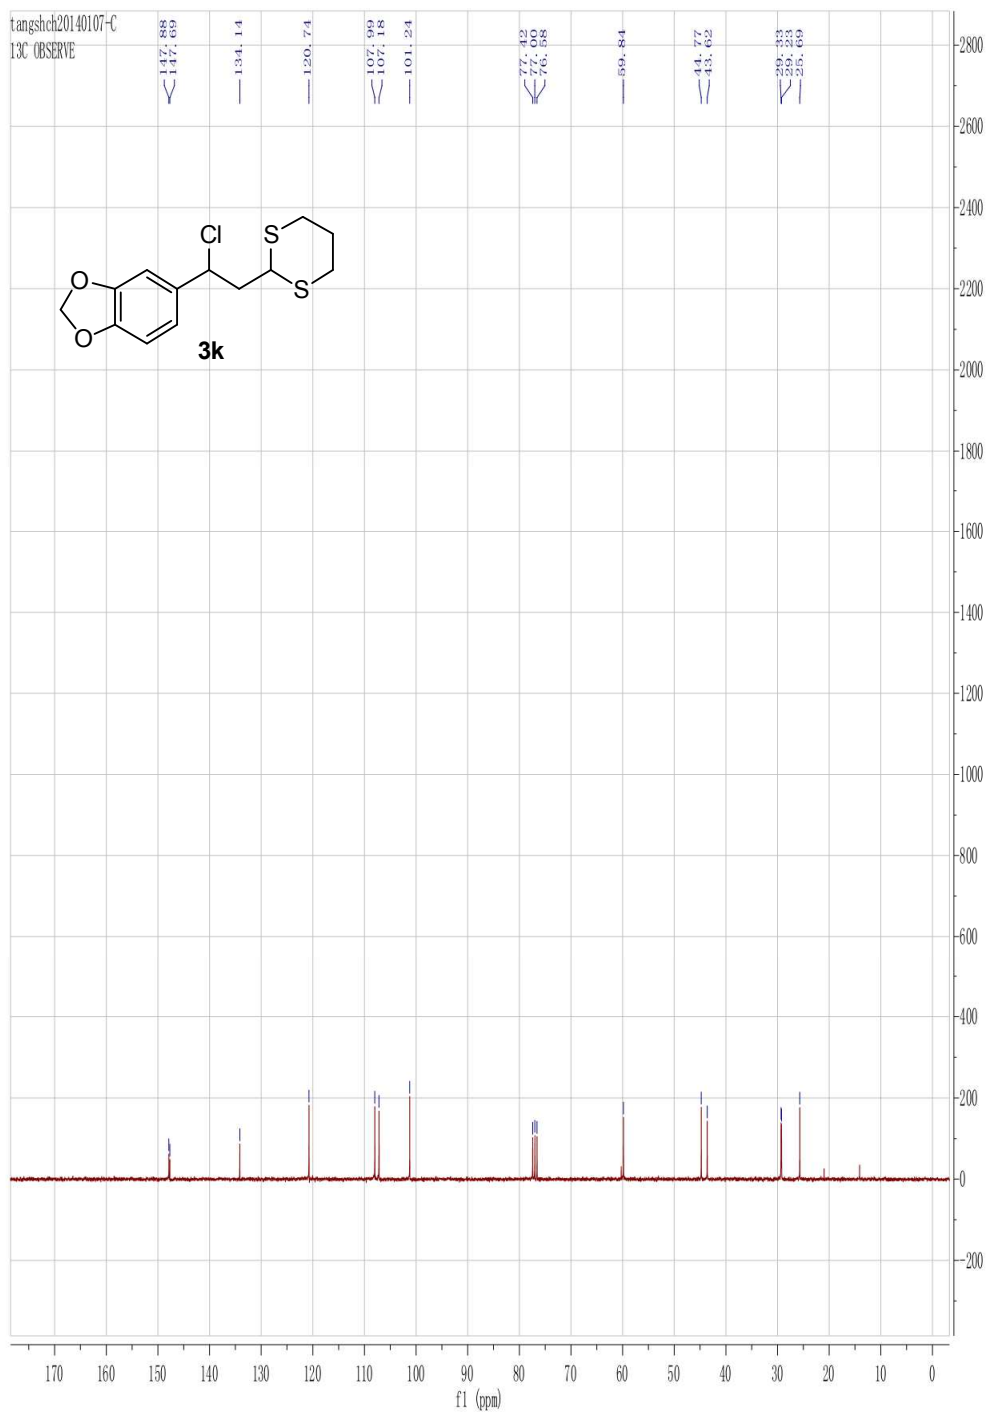

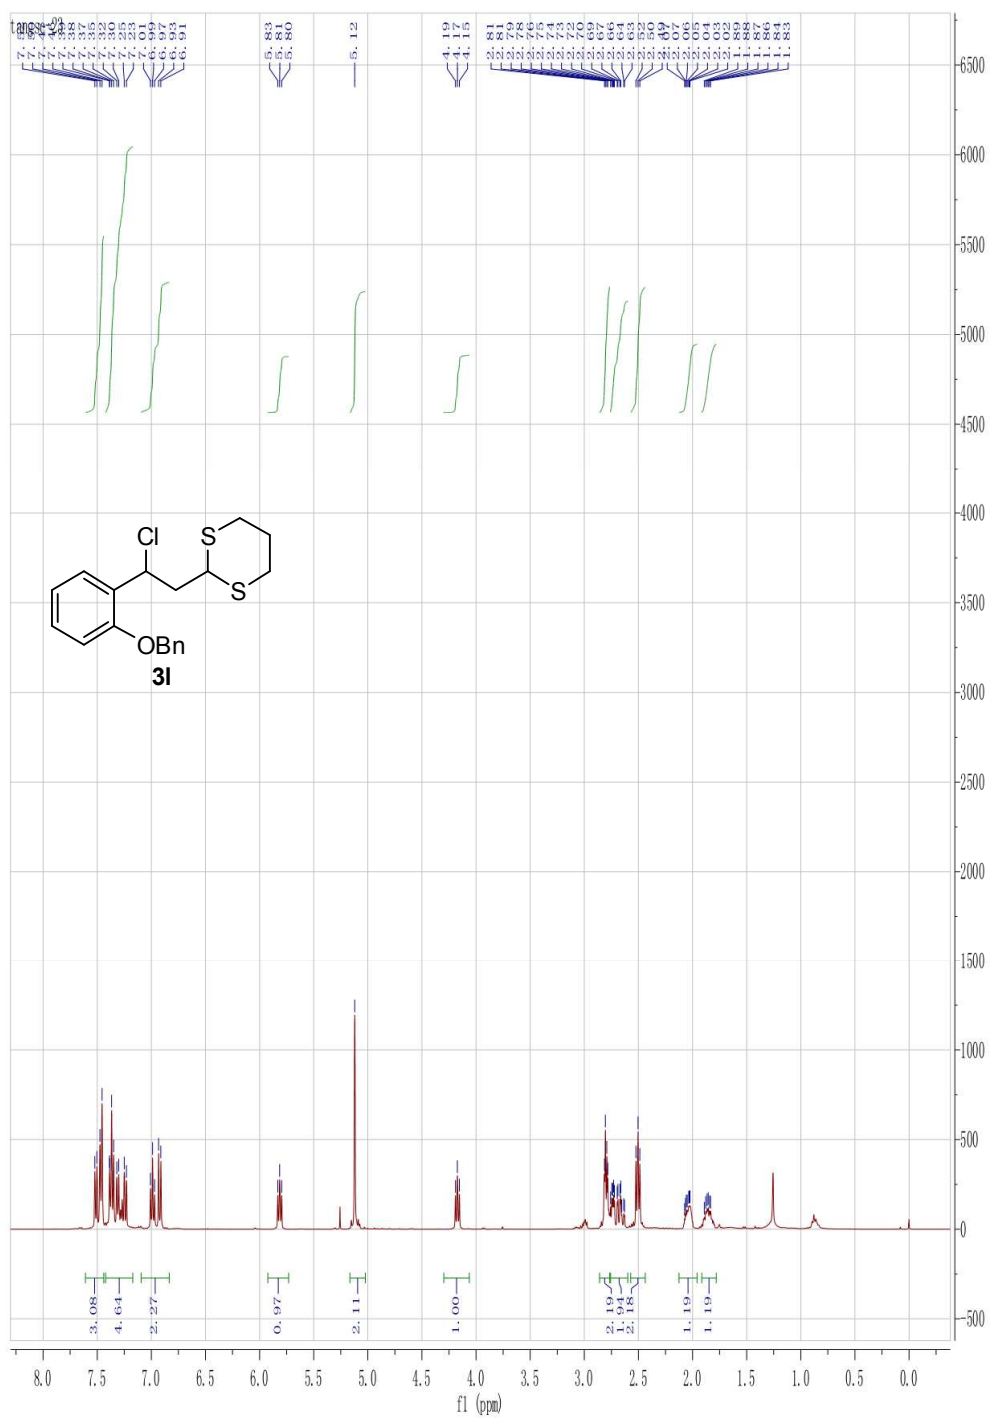

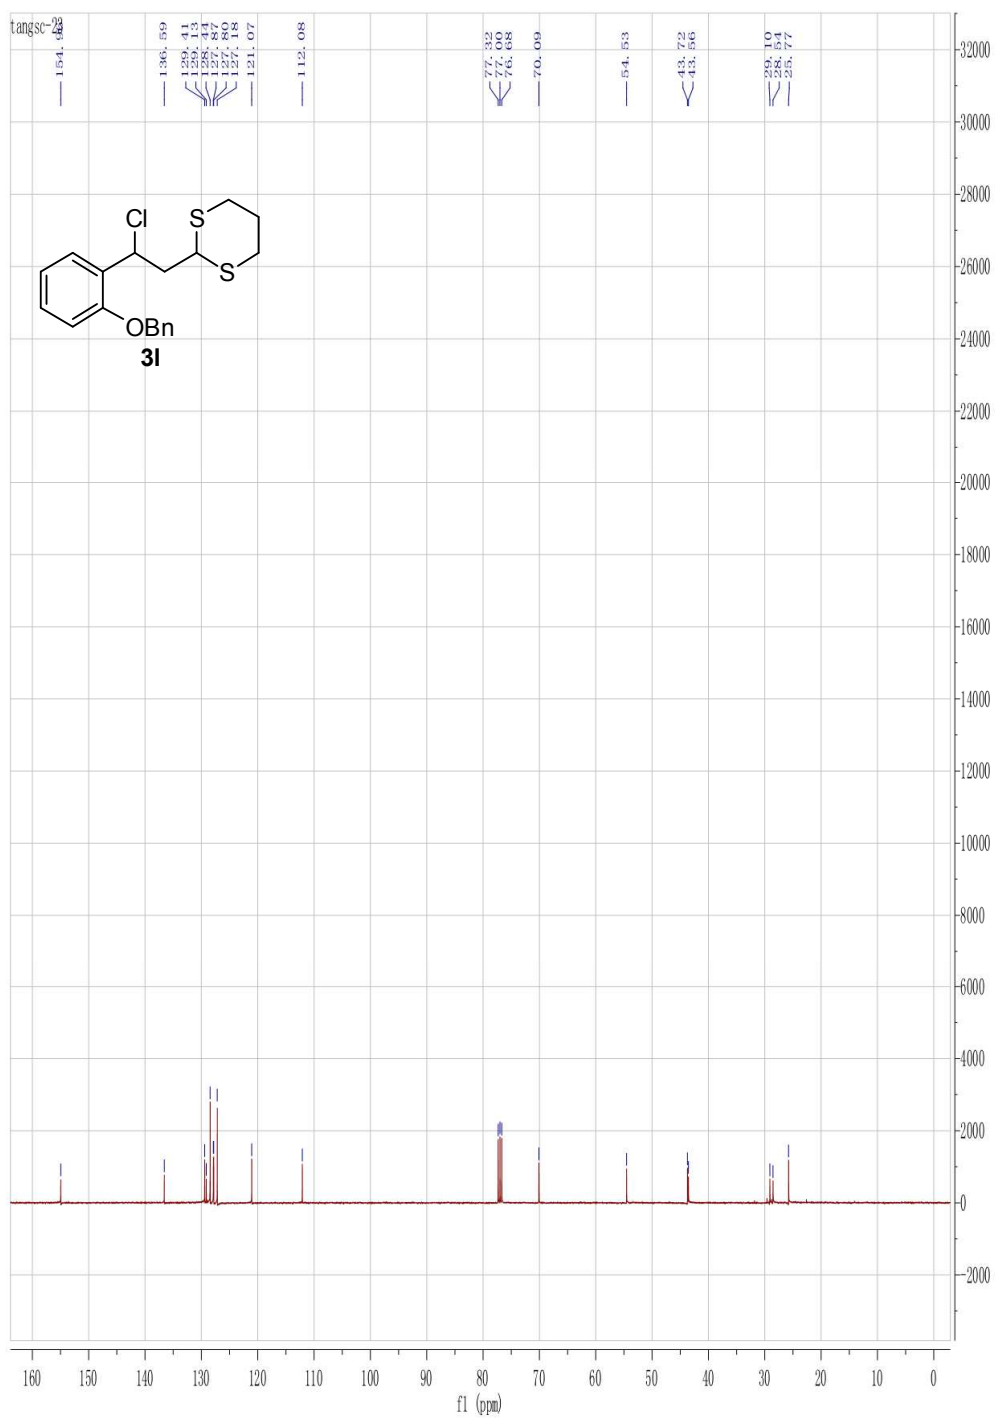

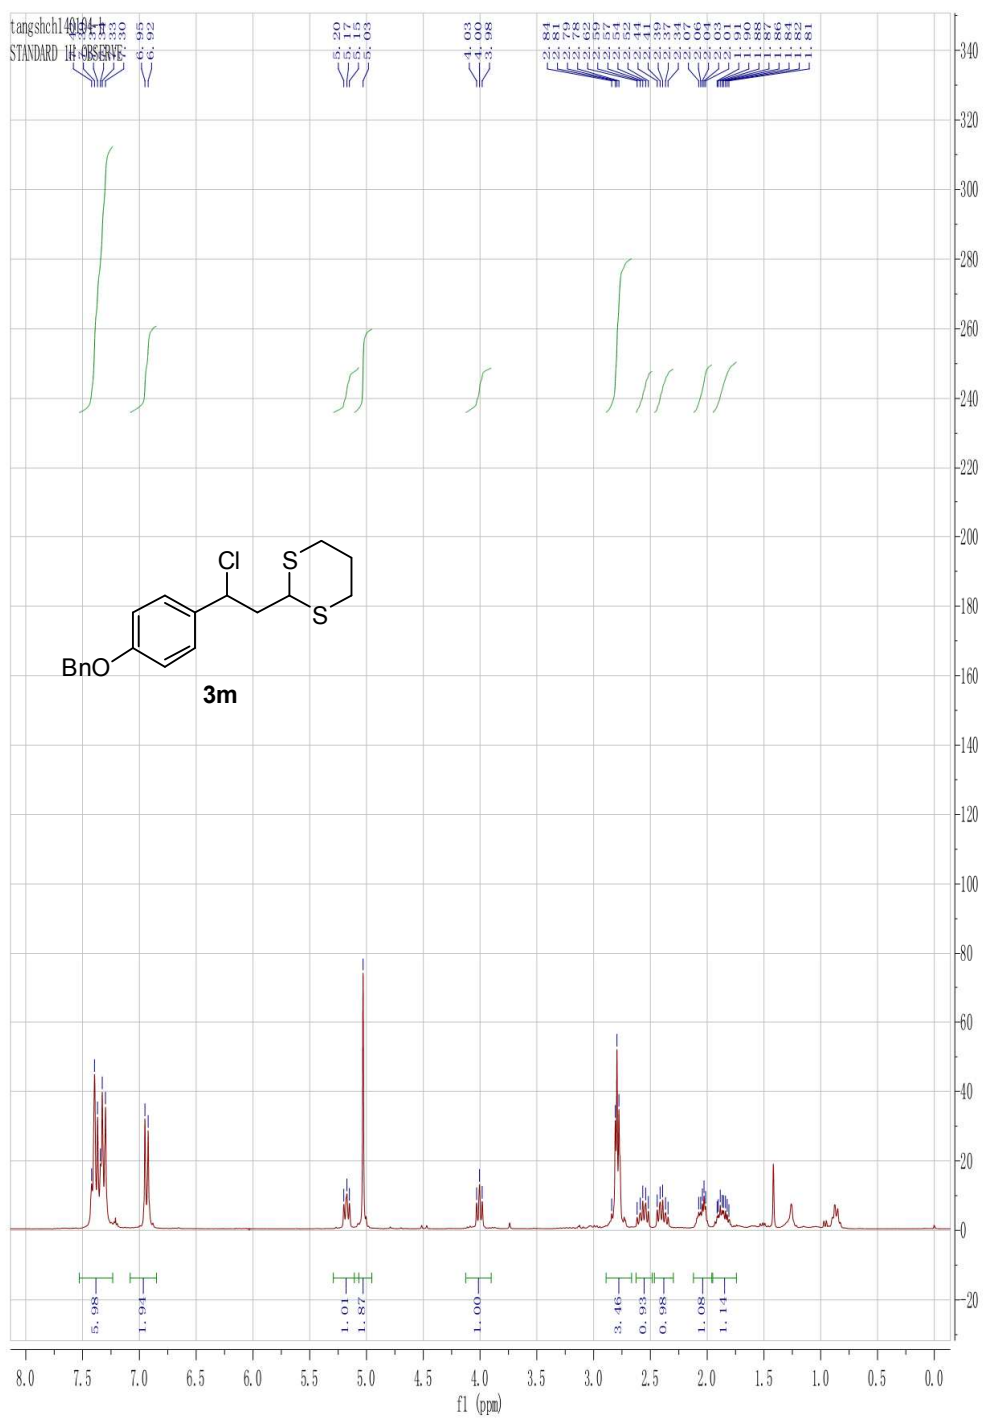

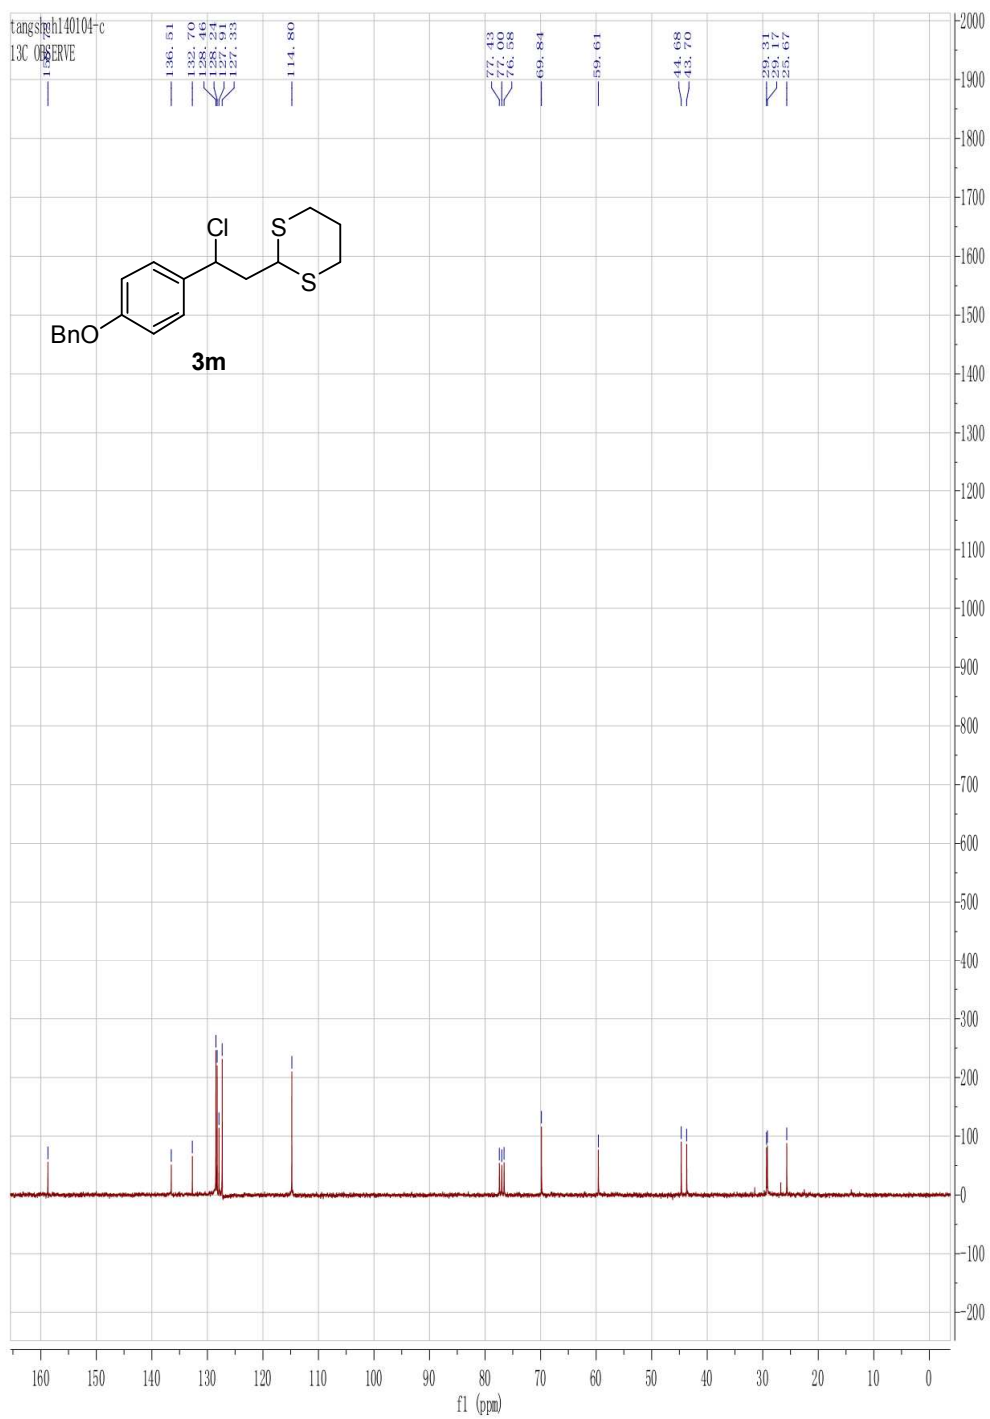

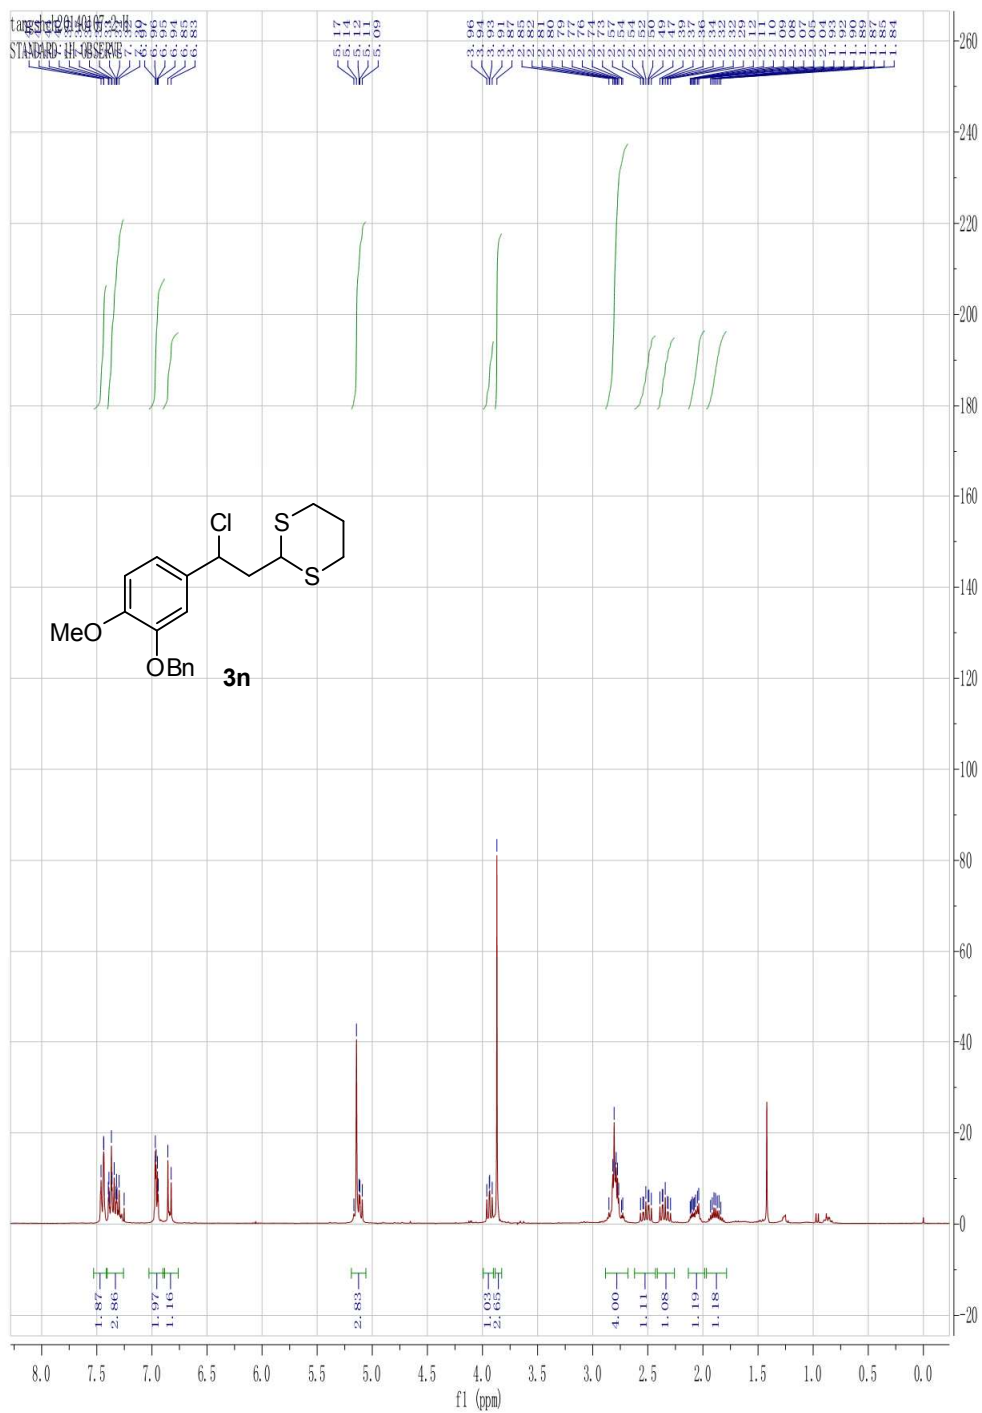

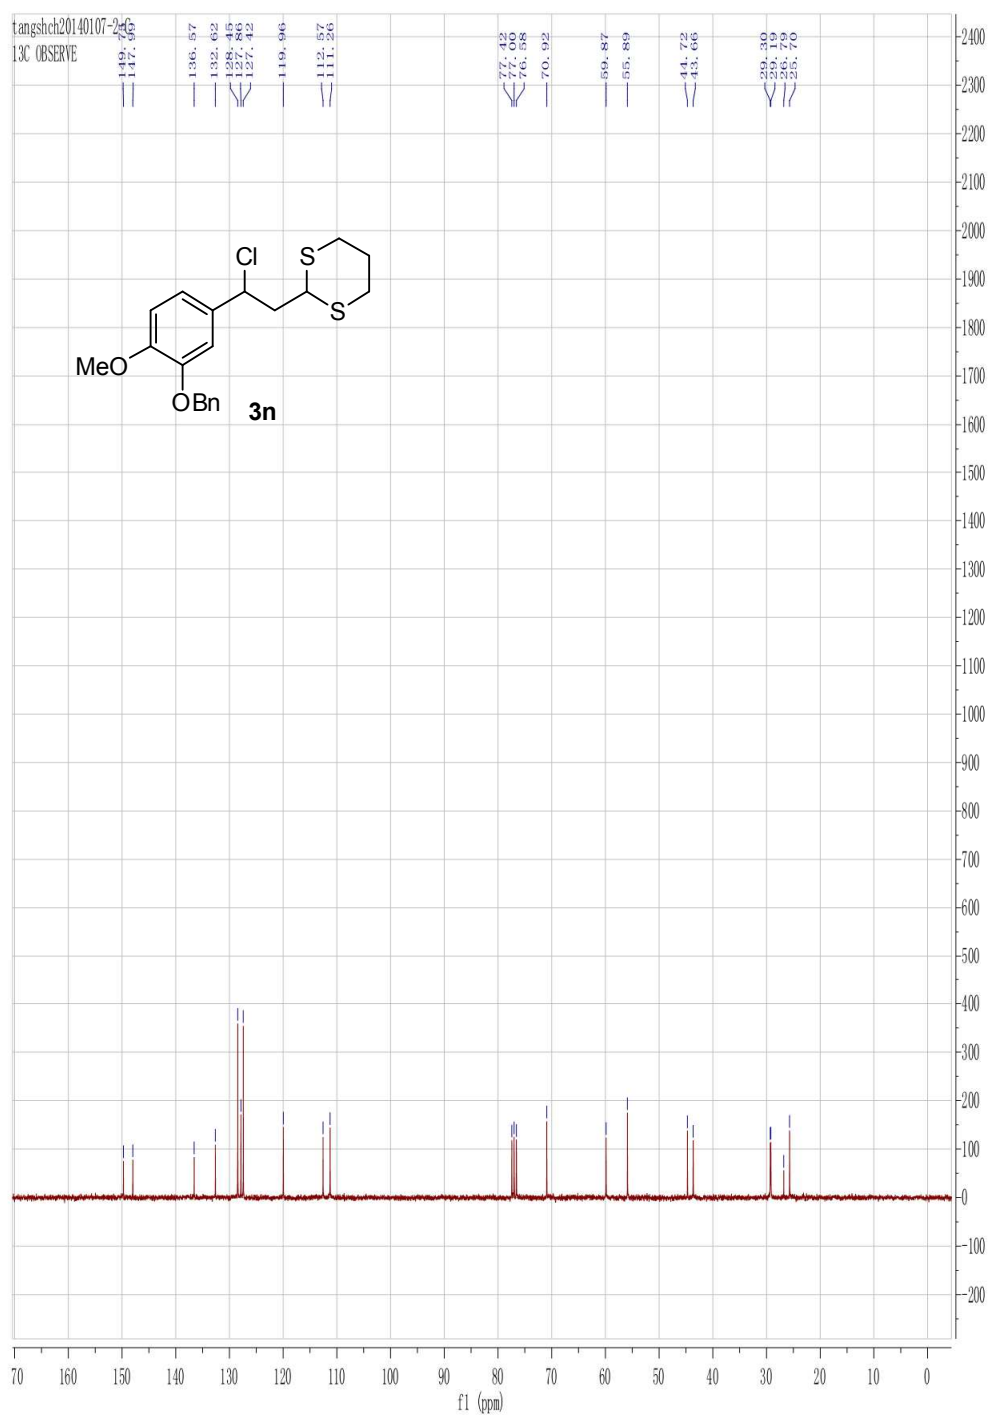

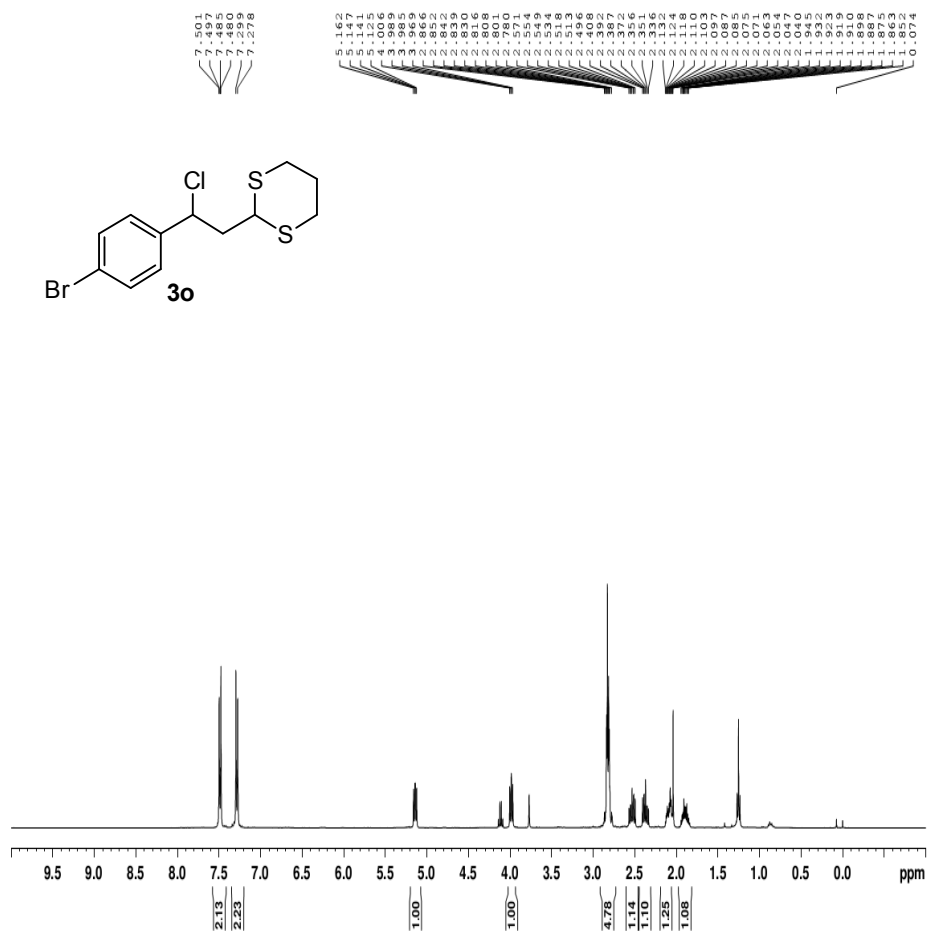



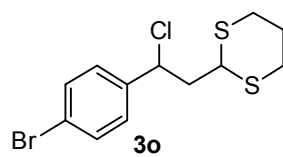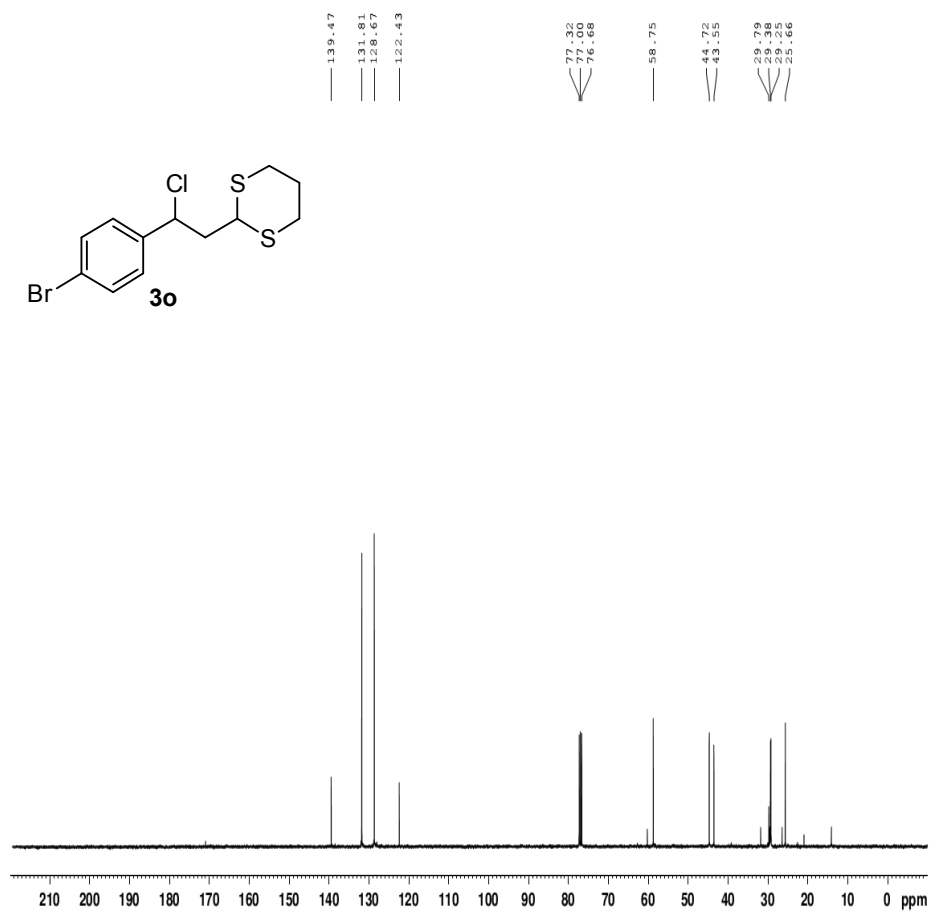

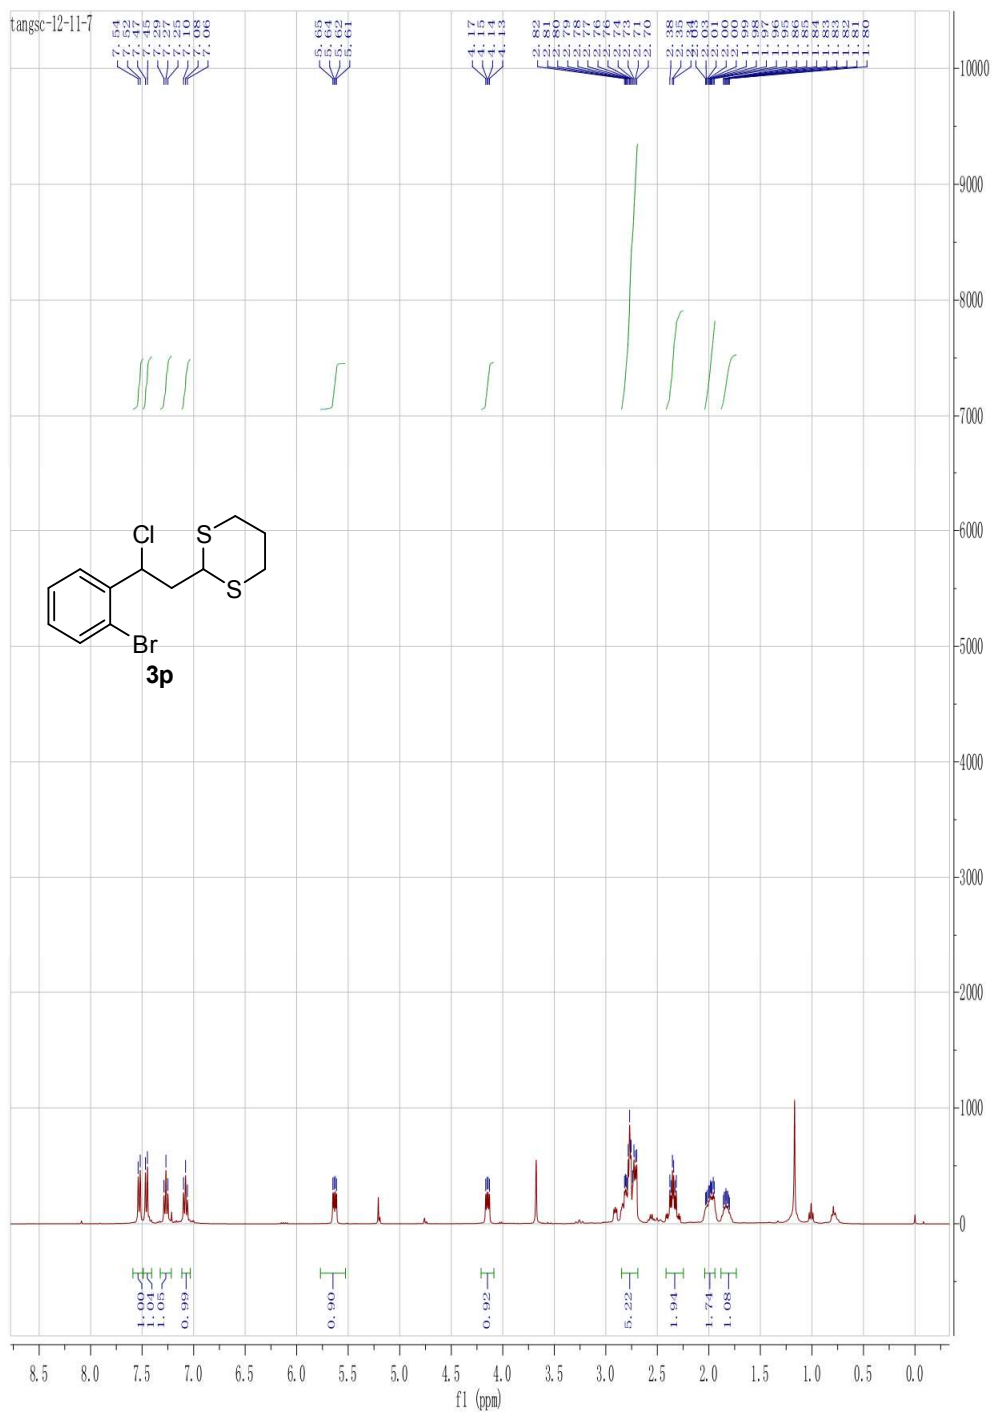

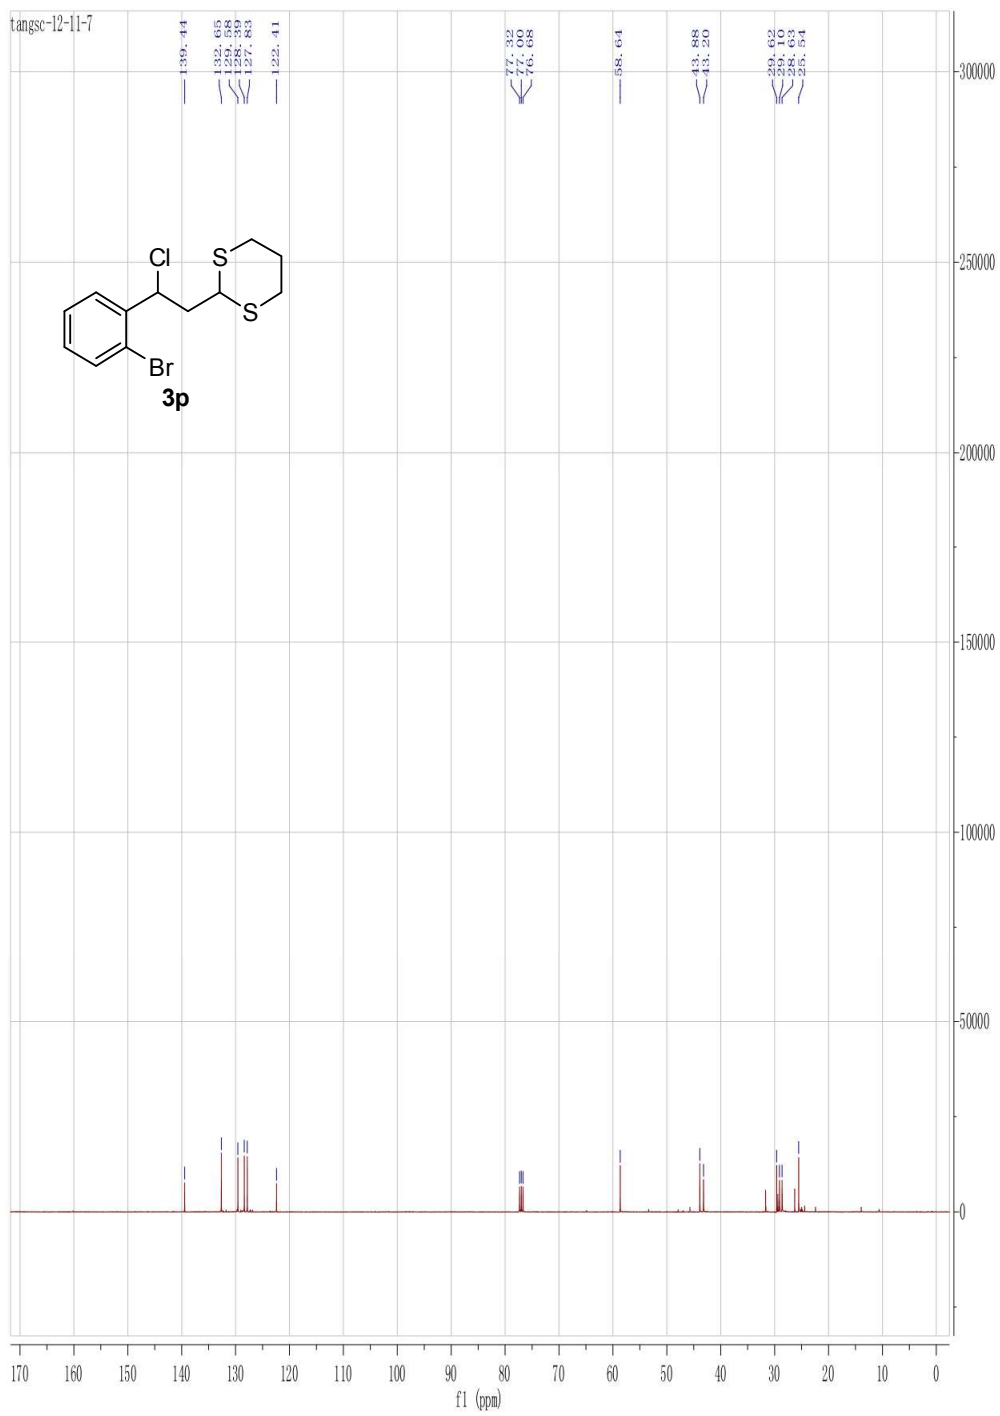

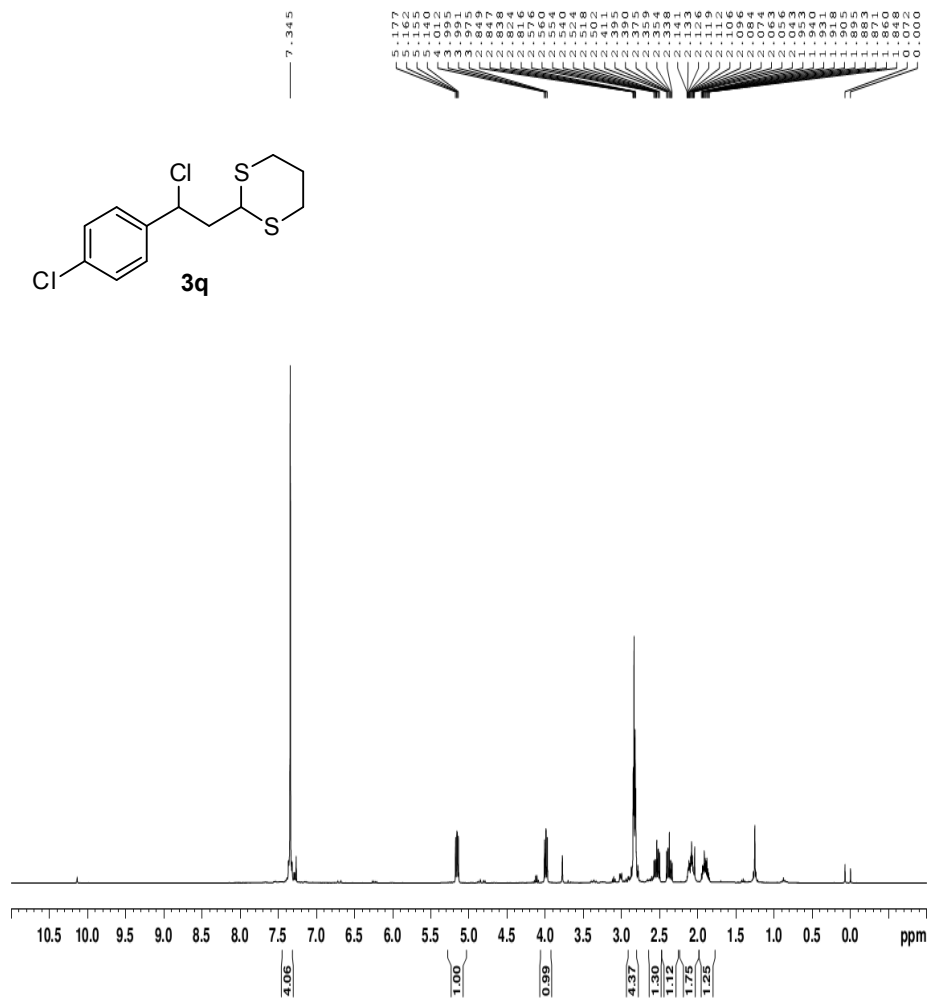

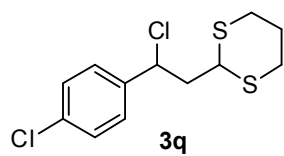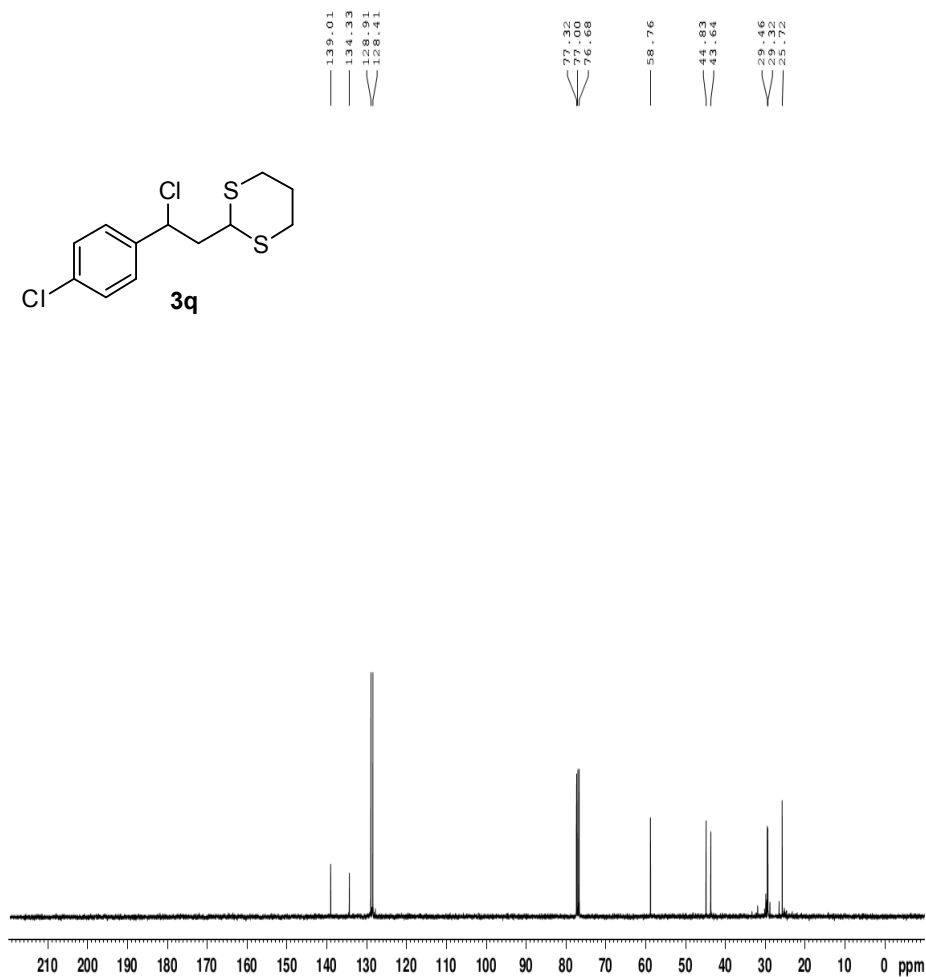

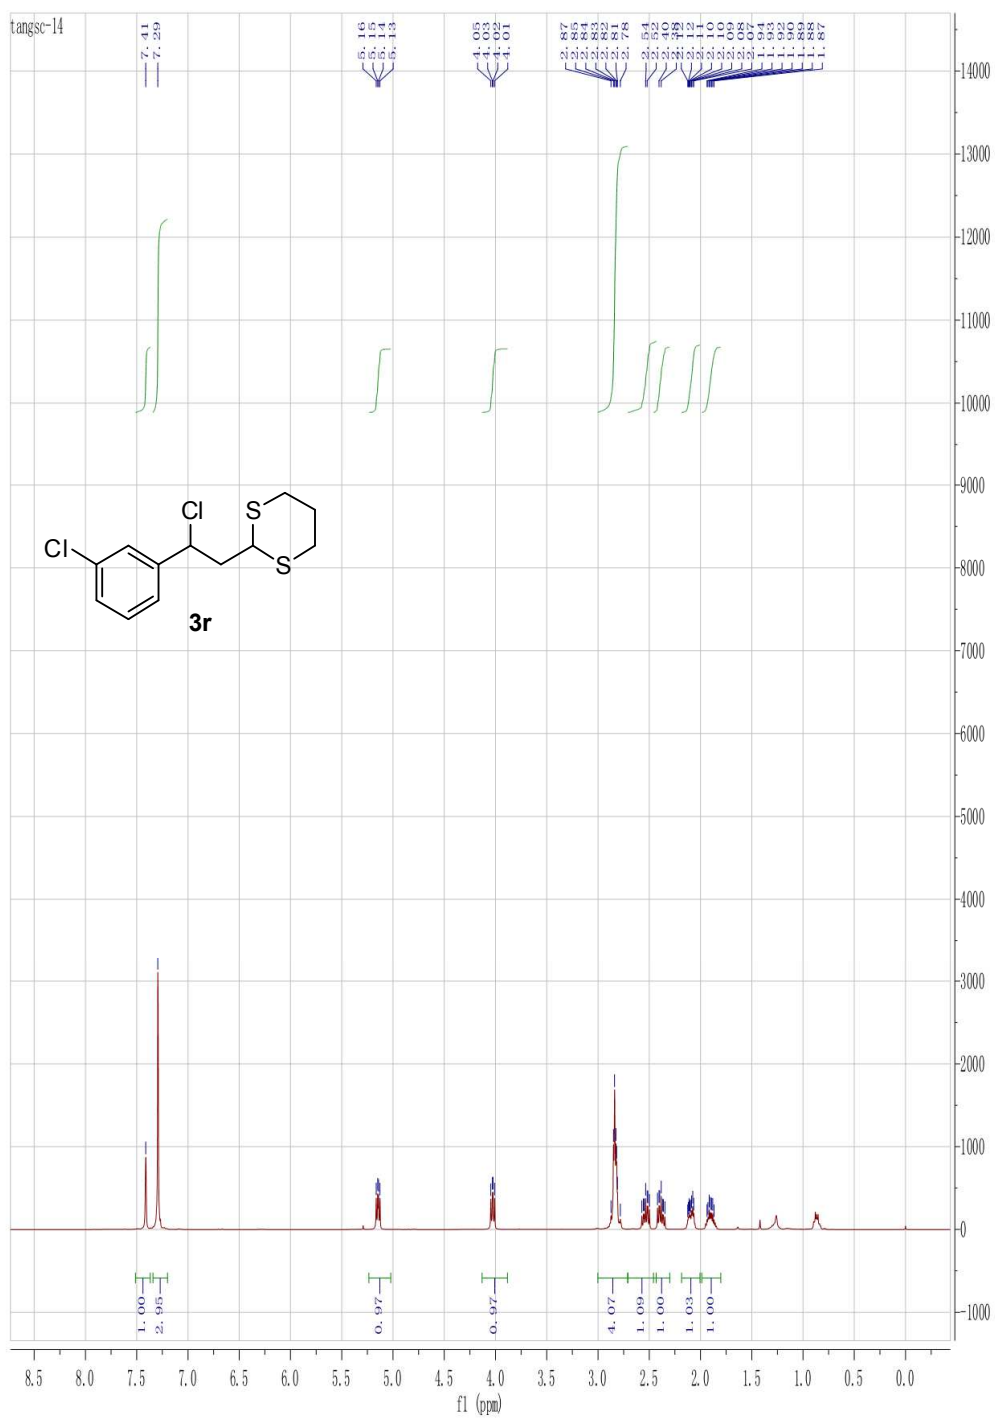

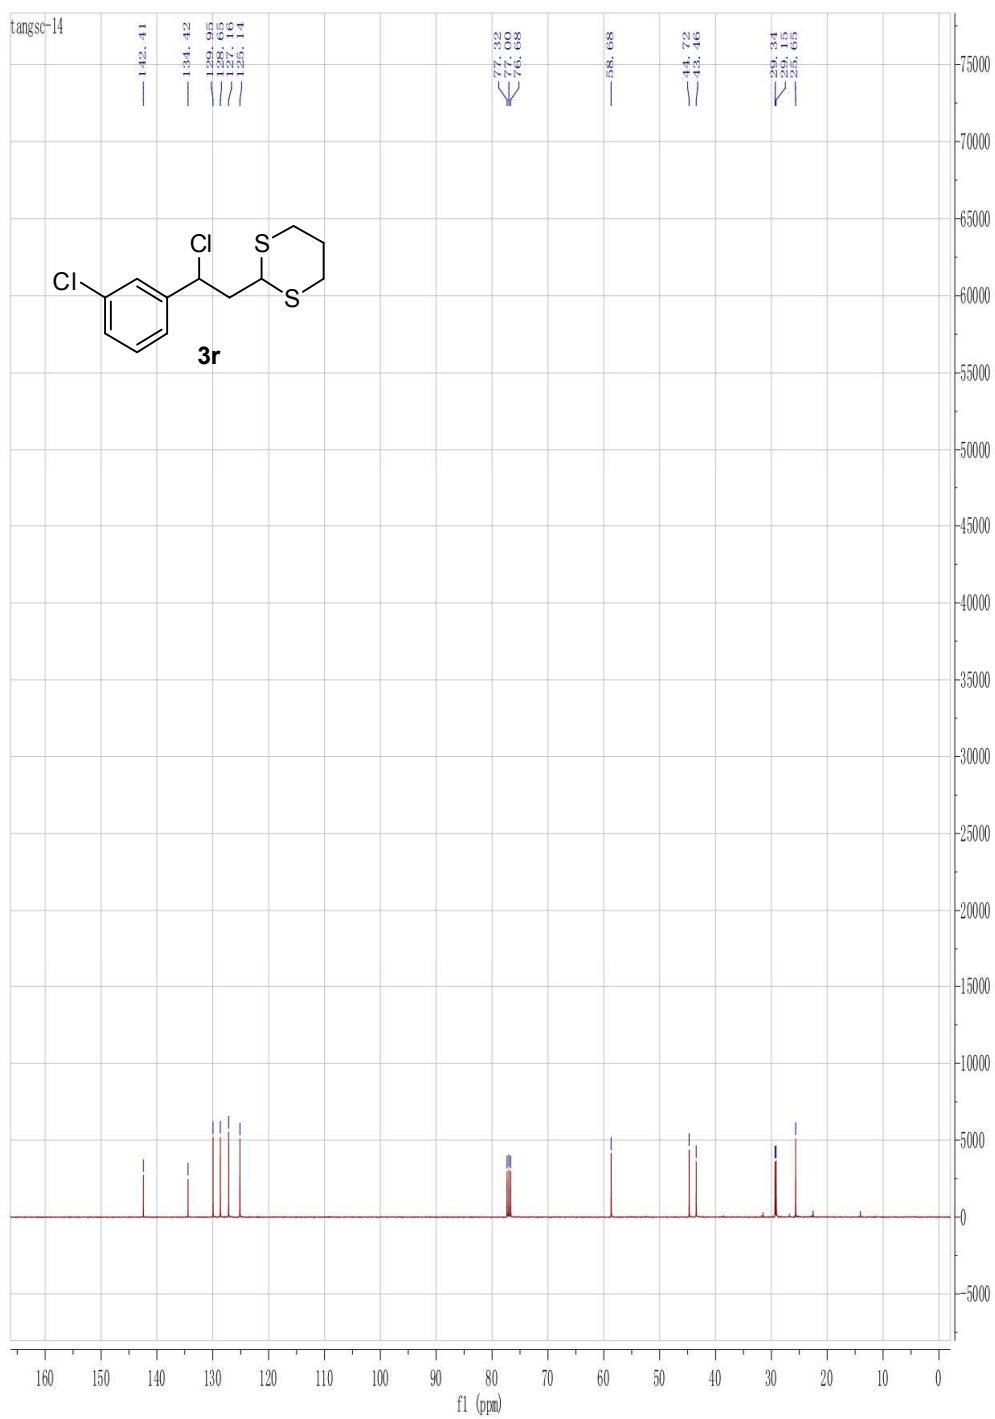

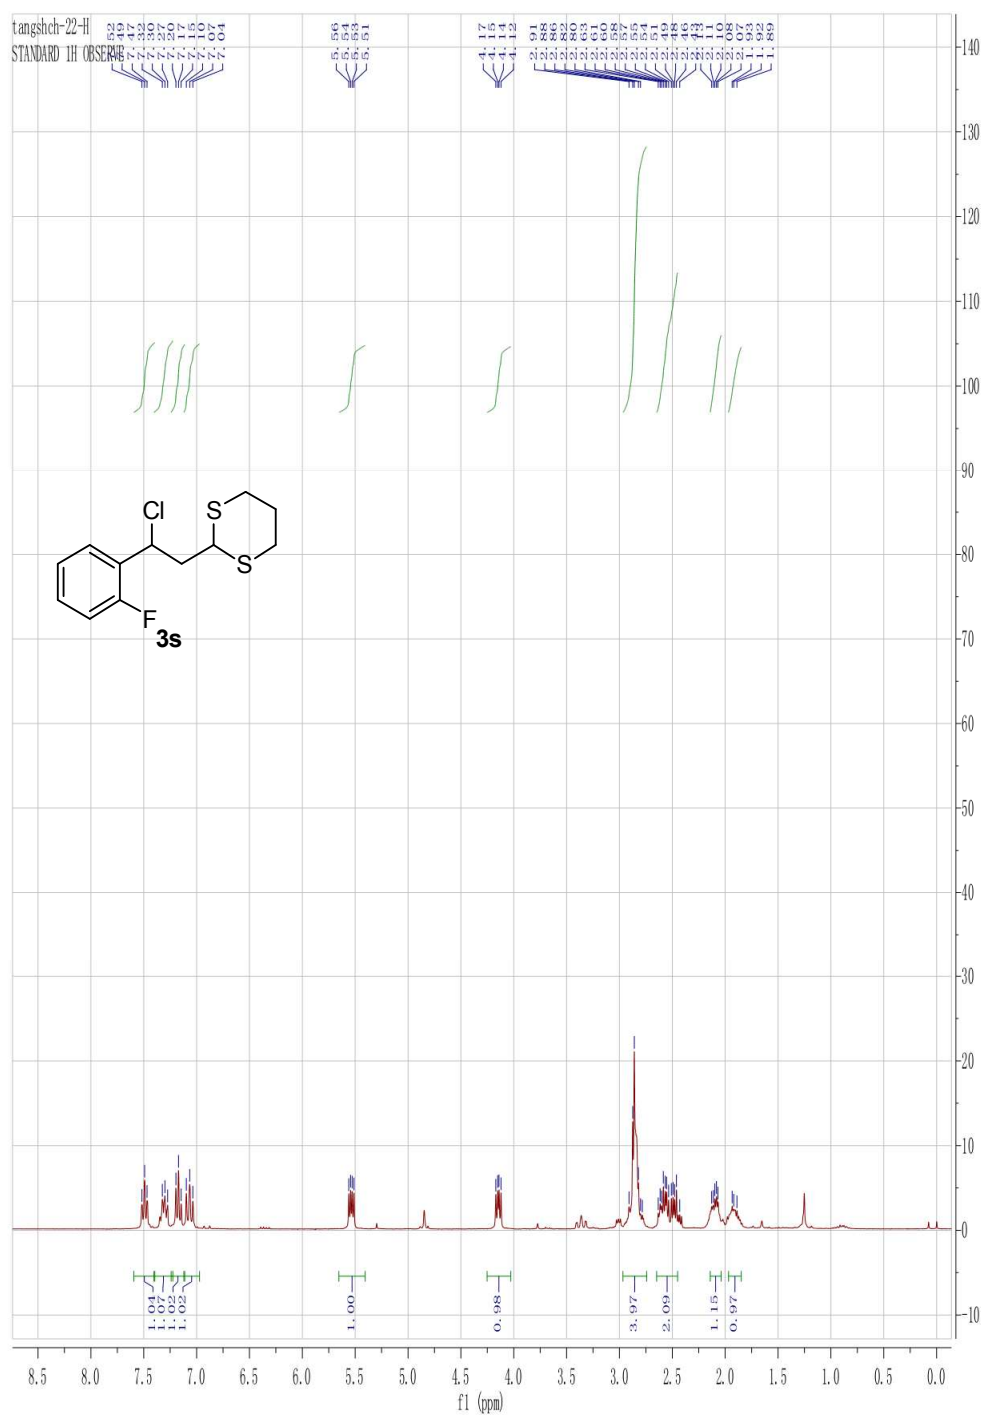



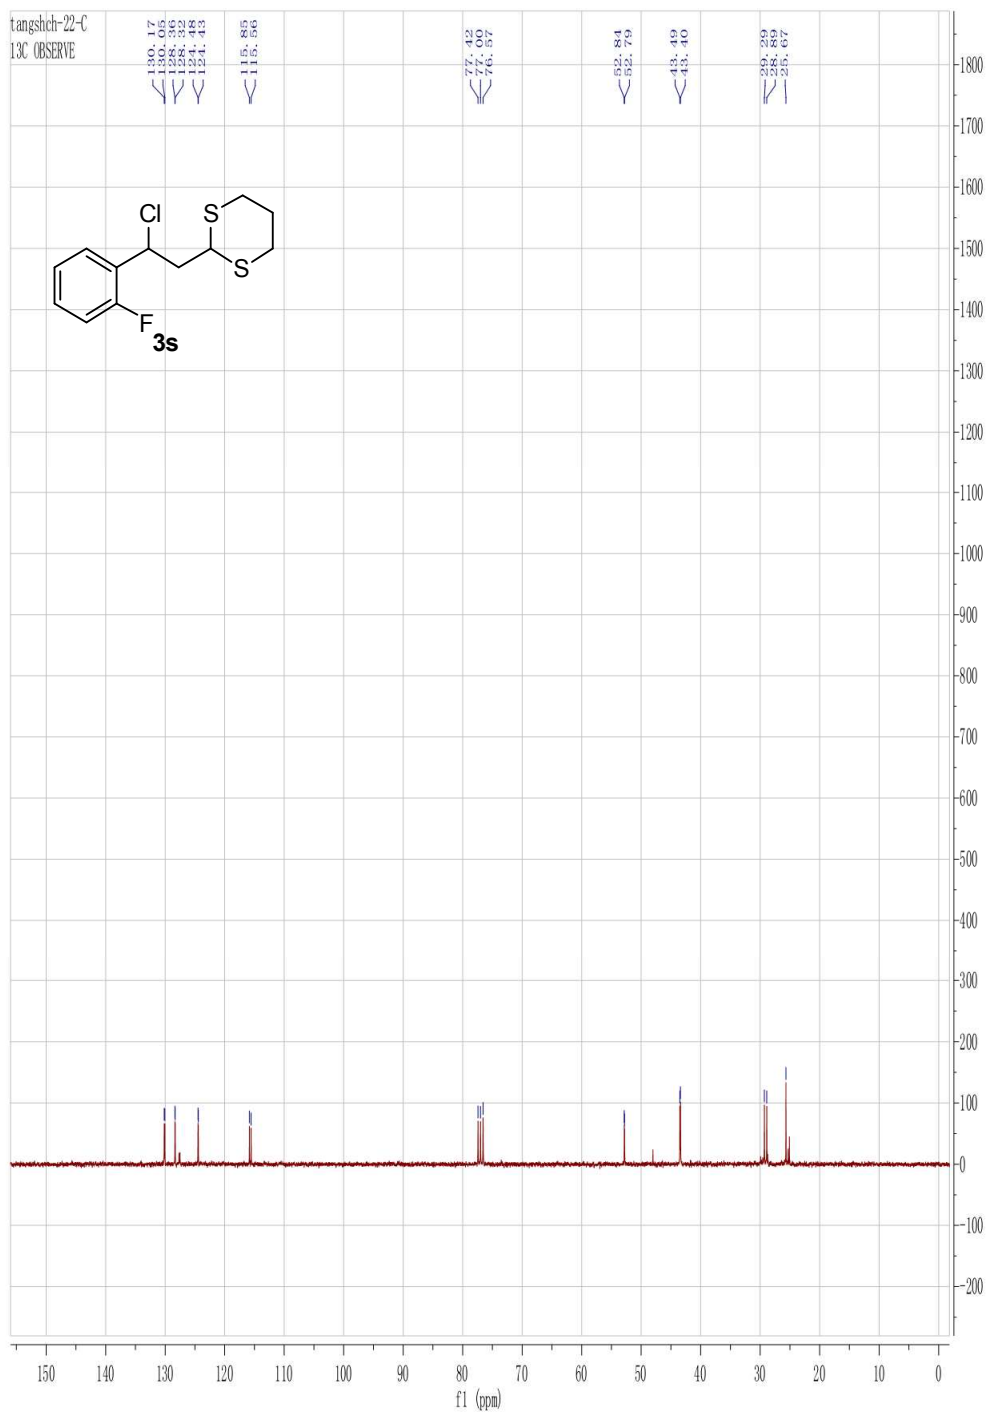

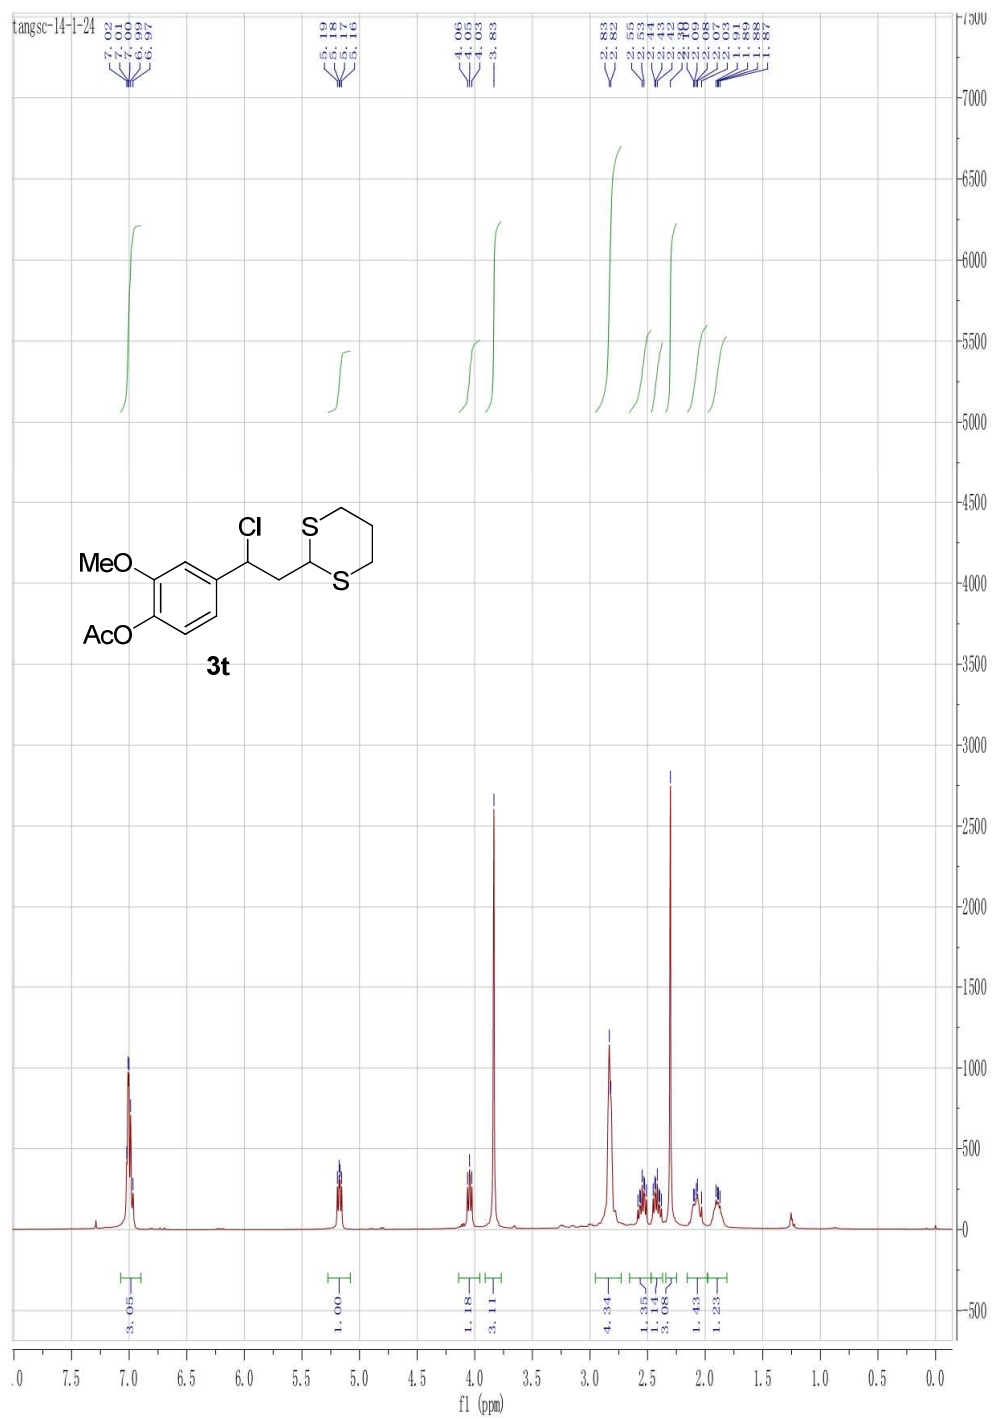

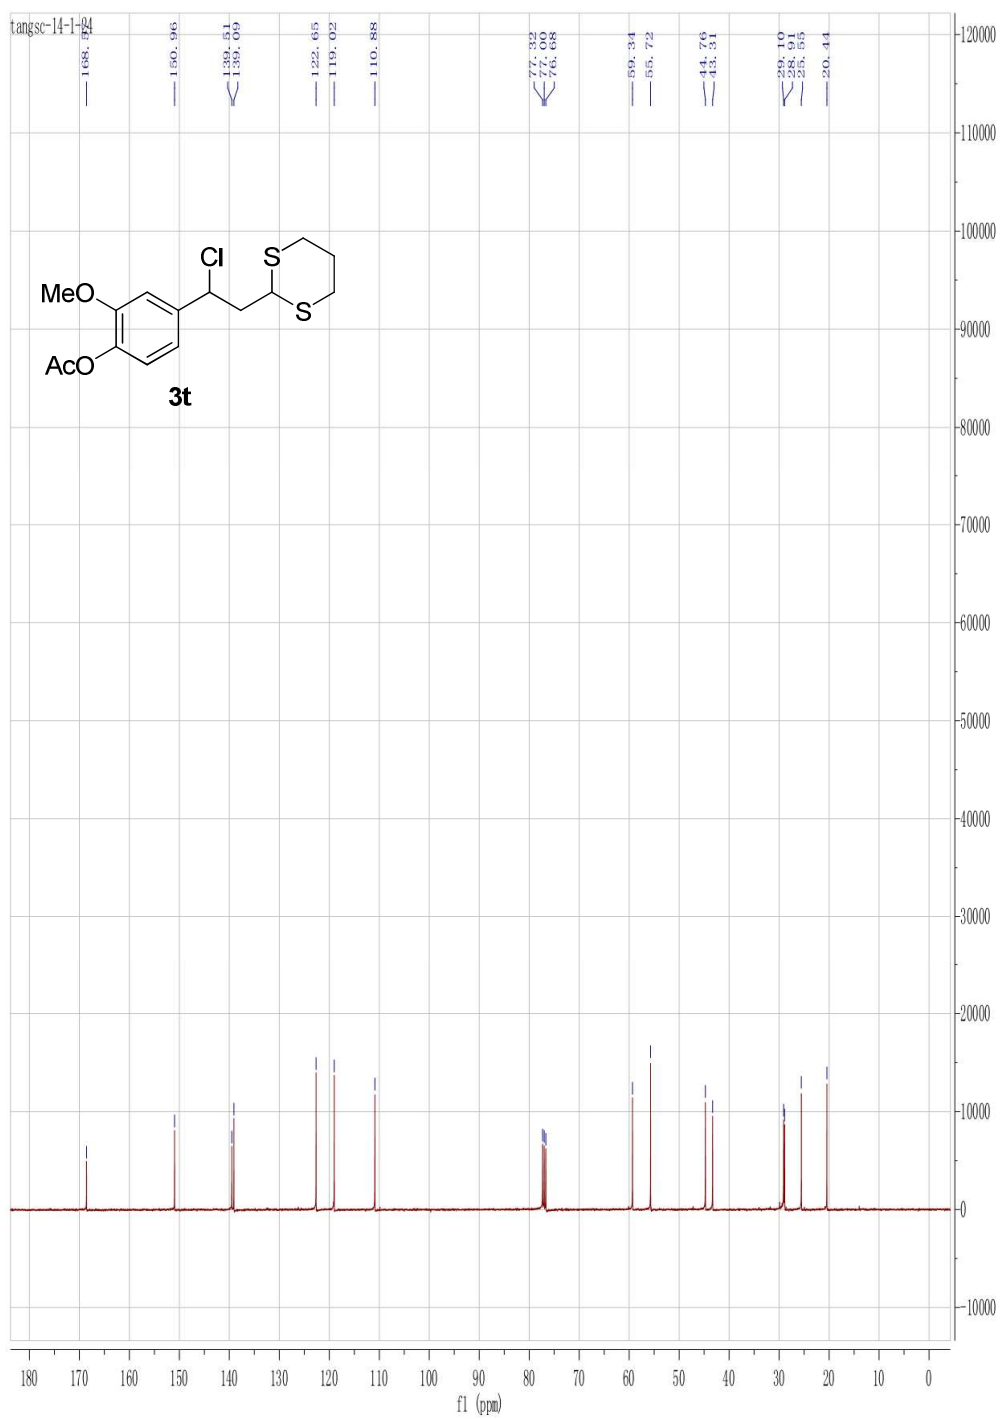

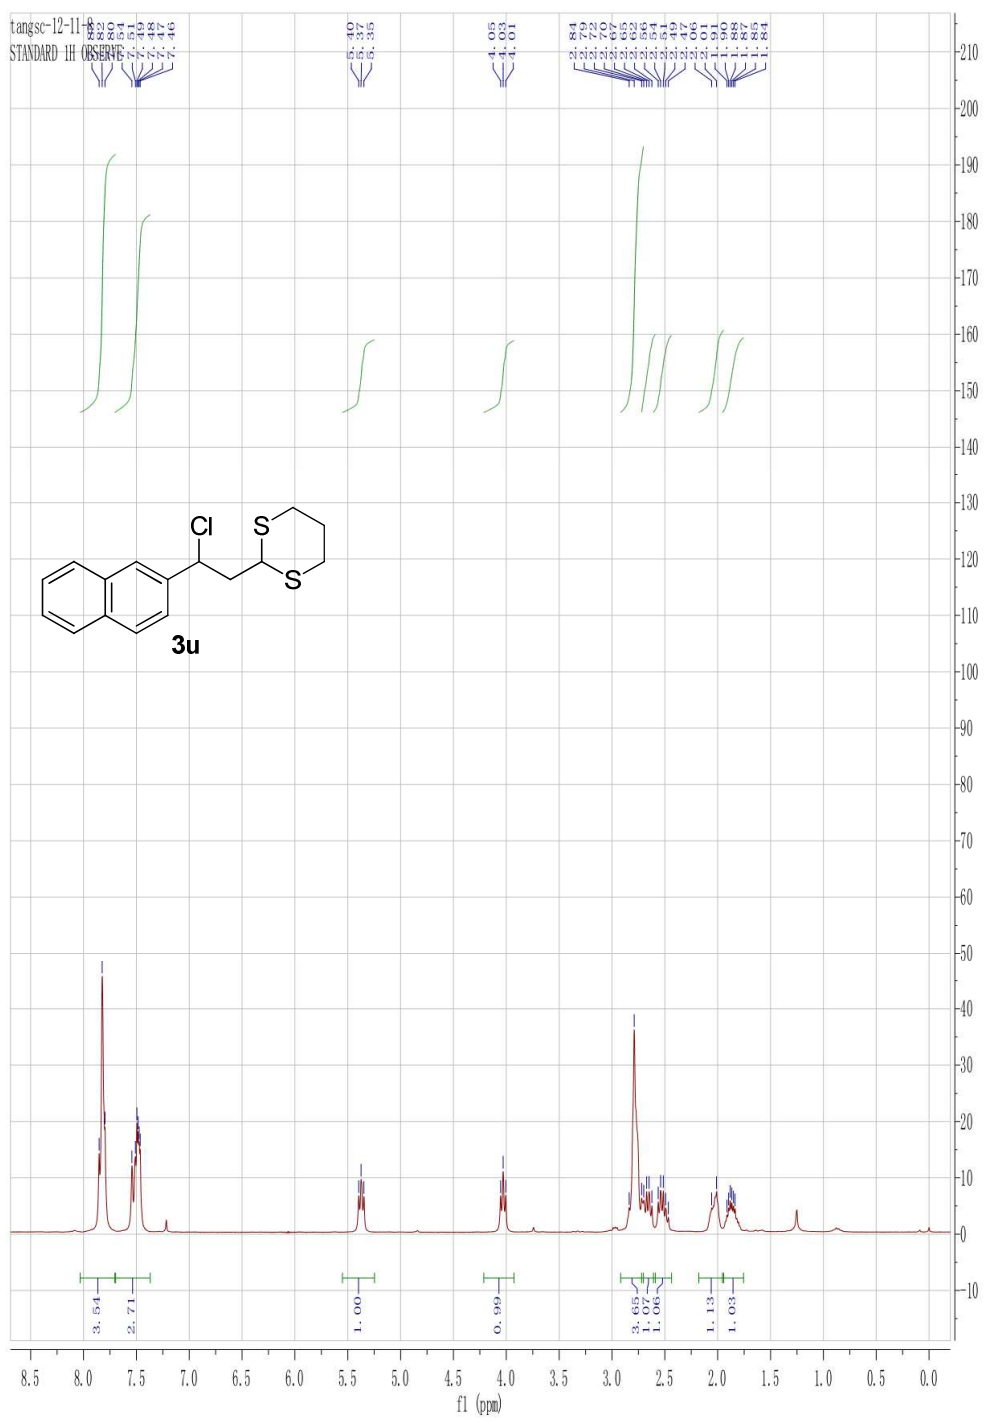

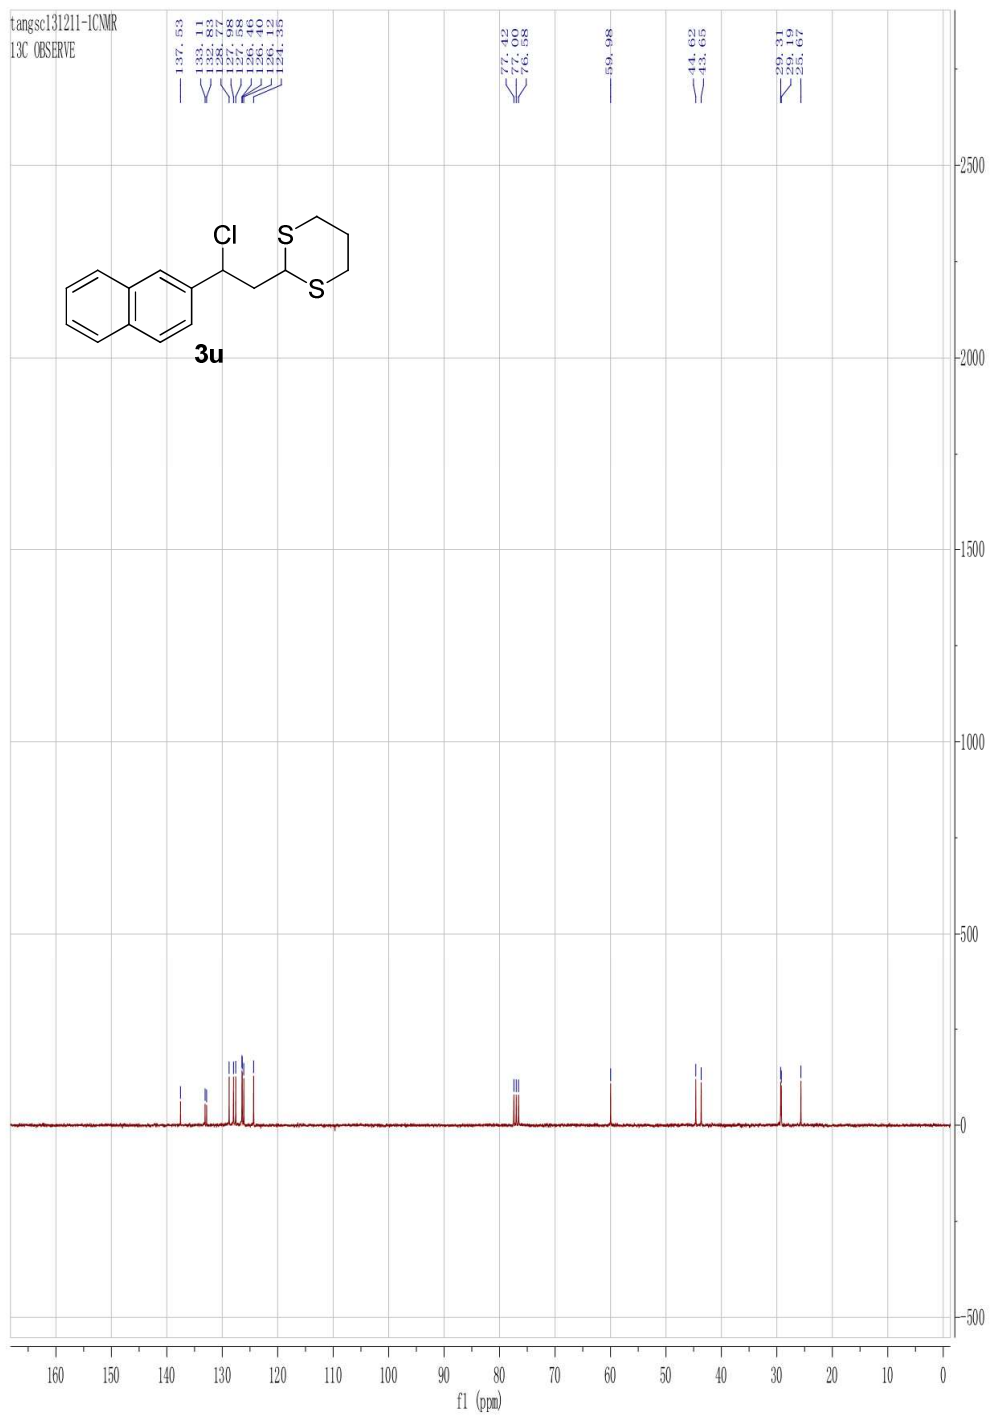

Supplement: Supplementary file 1 [file 3938995]
